**SOD1 activity thresholds and TOR signalling modulate VAP(P58S)  
aggregation via ROS-induced proteasomal degradation in a  
*Drosophila* model of Amyotrophic Lateral Sclerosis**

Kriti Chaplot<sup>1</sup>, Lokesh Pimpale<sup>1,a</sup>, Balaji Ramalingam<sup>2</sup>,  
Senthilkumar Deivasigamani<sup>1,b</sup> Siddhesh S. Kamat<sup>1</sup>, Girish S. Ratnaparkhi<sup>1,\*</sup>

<sup>1</sup>Department of Biology, Indian Institute of Science Education & Research, Pune  
411008, INDIA

<sup>2</sup>Oxford Nanoimaging Ltd, Oxford, UK

\*Author for Correspondence: [girish@iiserpune.ac.in](mailto:girish@iiserpune.ac.in)

Present Address

<sup>a</sup>Biotechnology Center, Technische Universität Dresden, Tatzberg 47/49, 01307  
Dresden, Germany

<sup>b</sup>Neurobiology and Epigenetics Unit, European Molecular Biology Laboratory, Adriano  
Buzzati-Traverso Campus, Via Ramarini 32, 00015 Monterotondo (RM), Italy.

**Running Title:** SOD1 and mTOR regulate VAPB aggregation via ROS

## 1 Abstract

2           Familial Amyotrophic Lateral Sclerosis (F-ALS) is an incurable, late onset motor  
3 neuron disease, linked strongly to various causative genetic loci. *ALS8* codes for a  
4 missense mutation, P56S, in VAMP-associated Protein B (VAPB) that causes the protein  
5 to misfold and form cellular aggregates. Uncovering genes and mechanisms that affect  
6 aggregation dynamics would greatly help increase our understanding of the disease and  
7 lead to potential therapeutics.

8           Here, we develop a quantitative high-throughput, *Drosophila* S2R+ cell-based  
9 kinetic assay coupled with fluorescent microscopy to score for genes involved in the  
10 modulation of aggregates of fly ortholog, VAP(P58S), tagged with GFP. As proof of  
11 principle, we conducted a targeted RNAi screen against 900 genes, consisting of VAP  
12 genetic interactors, other ALS loci, as also genes involved in proteostasis. The screen  
13 identified 150 hits that modify aggregation, including the ALS loci *SOD1*, *TDP43* and also  
14 genes belonging to the TOR pathway.

15           To validate these modifiers, we developed a system to measure the extent of  
16 VAP(P58S) aggregation in the *Drosophila* third instar larval brain using the *UAS-GAL4*  
17 system, followed by quantitative imaging of cellular inclusions. We find that reduction of  
18 *SOD1* activity or decreased TOR signalling reduces aggregation. Interestingly, we find  
19 that increase in cellular reactive oxygen species (ROS) levels, assessed by measuring  
20 oxidation of cellular lipids and proteins, in response to *SOD1* knockdown or by inhibition  
21 of TOR signalling appears to be the trigger for clearing of aggregates. The mechanism of  
22 aggregate clearance is, primarily, the proteasomal machinery, and not autophagy.  
23 Increase in VAP, but not VAP(P58S) levels, appears to elevate ROS, which may in turn  
24 regulate *VAP* transcription in a feedback loop.

25           We have thus uncovered an interesting interplay between *SOD1*, ROS and TOR  
26 signalling that regulates the dynamics of VAP aggregation. Mechanistic processes  
27 underlying such cellular regulatory networks will lead us to a better understanding of  
28 initiation and progression of ALS.

29  
30

## 31 **Keywords**

32 VAP, VAMP-associated Protein B; SOD1, Superoxide dismutase; mTOR or TOR,  
33 mechanistic Target of Rapamycin; ALS, Amyotrophic Lateral Sclerosis; ROS, Reactive  
34 Oxygen Species, PS, phosphatidylserine, PE, phosphatidylethanolamine; PUFA,  
35 polyunsaturated fatty acids; UPS, Ubiquitin Proteasomal System; ERAD, Endoplasmic  
36 Reticulum Associated Degradation.

37

38

## 39 **Introduction**

40 Amyotrophic lateral sclerosis (ALS) is a progressive, fatal neurodegenerative  
41 disease characterized by loss of motor neurons resulting in muscular atrophy, gradual  
42 paralysis and ultimately death of the patient within 2-5 years post diagnosis (CLEVELAND  
43 AND ROTHSTEIN 2001; TARASIUK *et al.* 2012). Most often, the disease occurs sporadically  
44 (S-ALS). However, in ~10% of the cases, the disease occurs due to inheritance of altered  
45 gene(s) (F-ALS). *ALS1/SOD1* coding for superoxide dismutase 1, was the first causative  
46 locus to be discovered (DENG *et al.* 1993; ROSEN *et al.* 1993), with more than 170 SOD1  
47 mutations attributed to the diseased state. Since then, about 50 potential genetic loci  
48 (TAYLOR *et al.* 2016) have been identified in ALS through Genome-wide association  
49 (GWAS), linkage and sequencing studies. Recent studies have emphasized on the  
50 oligogenic basis for ALS (VAN BLITTERSWIJK *et al.* 2012; DEIVASIGAMANI *et al.* 2014),  
51 suggesting that ALS loci may be a part of a gene regulatory network (GRN) that breaks  
52 down late in the life of a diseased individual. At the cellular level, several hallmarks of  
53 ALS include breakdown of cellular homeostasis (CLUSKEY AND RAMSDEN 2001),  
54 endoplasmic reticulum (ER) stress, unfolded protein response, aggregation, oxidative  
55 stress, mitochondrial dysfunction and autophagy. While several studies have  
56 demonstrated the wide-range of consequences of the genetic alterations on cellular  
57 function, no clear unifying mechanism has emerged that might explain the pathogenesis  
58 of the disease (ANDERSEN AND AL-CHALABI 2011; WALKER AND ATKIN 2011; MULLIGAN AND  
59 CHAKRABARTTY 2013; TURNER *et al.* 2013; TAYLOR *et al.* 2016).

60 In 2004, Mayana Zatz's group (NISHIMURA *et al.* 2004) discovered a novel causative  
61 genetic locus, VAMP-associated protein B (VAPB), termed as ALS8, in a large Brazilian  
62 family whose members succumbed to ALS and/or Spinal muscular atrophy (SMA). The

63 point mutation of P56S was identified in the N-terminal, Major Sperm Domain (MSP) of  
64 VAPB (NISHIMURA *et al.* 2004). VAPB is an integral membrane protein present in the ER  
65 membrane, ER-Golgi intermediate compartment, mitochondrial-associated membrane  
66 and the plasma membrane, implicated in important functions in the cell such as vesicular  
67 trafficking, ER structure maintenance, lipid biosynthesis, microtubule organization,  
68 mitochondrial mobility and calcium homeostasis (LEV *et al.* 2008; MURPHY AND LEVINE  
69 2016). Recent studies have highlighted its critical role in membrane contact sites (ALPY  
70 *et al.* 2013; GOMEZ-SUAGA *et al.* 2017b; METZ *et al.* 2017; YADAV *et al.* 2018; ZHAO *et al.*  
71 2018). The *Drosophila* ortholog of VAPB is VAP33A/CG5014 (Called VAP hereafter) and  
72 has been used to develop models for ALS (CHAI *et al.* 2008; RATNAPARKHI *et al.* 2008;  
73 DEIVASIGAMANI *et al.* 2014; MOUSTAQIM-BARRETTE *et al.* 2014; SANHUEZA *et al.* 2015). We  
74 have previously identified a *Drosophila* VAP GRN comprising of 406 genes, including a  
75 novel interaction with the mTOR pathway (DEIVASIGAMANI *et al.* 2014). The ALS8 mutation  
76 can also alter VAP's physical interaction with other proteins, including FFAT motif  
77 containing proteins (LOEWEN *et al.* 2003; MURPHY AND LEVINE 2016), impairing cellular  
78 functions (DE VOS *et al.* 2012; MOUSTAQIM-BARRETTE *et al.* 2014; HUTTLIN *et al.* 2015).  
79 Ubiquitinated cellular aggregates (RATNAPARKHI *et al.* 2008; PAPIANI *et al.* 2012) are seen  
80 on VAP mutant expression, and are capable of sequestering the wildtype VAP protein in  
81 a dominant negative manner (TEULING *et al.* 2007; RATNAPARKHI *et al.* 2008). In  
82 *Drosophila*, neuronal overexpression of VAP(P58S), and subsequent formation of  
83 aggregates, in the background of endogenous VAP appear to lead to only mild  
84 neurodegenerative phenotypes, such as flight defects, as compared to the more severe  
85 phenotypes associated with wild type VAP neuronal overexpression (RATNAPARKHI *et al.*  
86 2008; TSUDA *et al.* 2008). Previously, we have used the UAS-GAL4 system to study the  
87 interaction between VAP and mTOR signalling using the NMJ phenotype associated with  
88 neuronally overexpressed VAP(P58S)(DEIVASIGAMANI *et al.* 2014). The functional  
89 consequence of neuronal VAP(P58S) aggregation in this system is not fully understood  
90 and its contribution to disease remains elusive.

91 In this study, we identify 150 genetic modifiers of VAP(P58S) *aggregation* by  
92 conducting a directed S2R+ cell based RNAi screen, targeting 900 unique genes  
93 belonging to different categories that are associated either with ALS or VAP function or

94 proteostasis. We used the previously described (C155-Gal4;UAS-VAP(P58S)) system  
95 (RATNAPARKHI *et al.* 2008; DEIVASIGAMANI *et al.* 2014) to validate one such modifier, SOD1,  
96 *in vivo*, in the third instar larval brain of *Drosophila* by measuring changes in aggregation  
97 of VAP(P58S) in response to modulation of *SOD1* levels. Our data indicates that  
98 clearance of VAP(P58S) aggregates via the proteasomal machinery is enhanced by  
99 inducing reactive oxygen species (ROS) due to loss of SOD1 function. We also find a  
100 similar clearance of aggregation, attributed to proteasomal degradation, with mTOR  
101 downregulation accompanied by elevated ROS. We find that wild type VAP, but not  
102 mutant VAP, elevates ROS. Accumulated ROS results in inhibition of endogenous *VAP*  
103 transcription, a phenomenon that may directly affect both familial as well as sporadic ALS  
104 pathogenesis.

105

106 **Results**

107

108 *A Drosophila S2R+ cell culture model to study VAP(P58S) aggregation*

109 C-terminal and N-terminal fusions of VAP and VAP(P58S) with GFP were used to  
110 transfect cells and generate stable S2R+ lines, as described in Materials & Methods (Fig.  
111 1A, Suppl. Fig. 1A). VAP:GFP showed a non-nuclear, reticular localization in the cell with  
112 <10% of the transfected (GFP-positive) cells showing high intensity puncta (Fig. 1B,  
113 Suppl. Fig. 1A). In contrast, >80% of the GFP-positive VAP(P58S):GFP, cells showed  
114 distinct high intensity puncta with little or no background staining within the cell (Fig. 1C,  
115 Suppl. Fig. 1A). Super resolution imaging confirmed that VAP appeared to be reticular,  
116 while VAP(P58S) was found in inclusion bodies (Fig. 1D). In contrast, GFP, when  
117 expressed showed a uniform cytoplasmic signal (Suppl. Fig. 1B). Both N-terminal GFP  
118 fusions, GFP:VAP and GFP:VAP(P58S) showed puncta formation at levels comparable  
119 to VAP(P58S):GFP, and hence were not used further in the study (Suppl. Fig. 1A). All  
120 further experiments (see next section) were carried out with stable lines expressing  
121 VAP:GFP or VAP(P58S):GFP, which showed expected/relevant localization and levels  
122 of aggregation.

123

124 *An S2R+ cell based reverse genetics screen is developed to identify modifiers of*  
125 *VAP(P58S) aggregation*

126 In an attempt to identify genetic modifiers of VAP(P58S) aggregation kinetics, we  
127 conducted a focused S2R+ cell based RNAi screen, targeting 900 unique genes  
128 belonging to nine different categories or families associated with ALS or VAP function.  
129 We generated stable S2R+ cell lines expressing VAP(P58S):GFP under a Cu<sup>2+</sup> induced  
130 promoter. The inducible cell culture system allowed us to increase the VAP(P58S):GFP  
131 protein levels in the cell with increasing copper sulphate (CuSO<sub>4</sub>) concentrations (250μM,  
132 500μM, 750μM and 1000μM) at 24 hours post induction (Fig. 1E). Using fluorescence  
133 microscopy, we found a linear relationship between the copper sulphate (CuSO<sub>4</sub>)  
134 concentrations and also the fraction of cells showing VAP(P58S):GFP aggregates that  
135 also increased with time (24 and 36 hours) post induction (Fig. 1F). The concentration  
136 dependent increase in relative levels of VAP(P58S):GFP correlated with an increase in  
137 fraction of cells showing aggregates (Fig. 1G), indicating the propensity of the mutant

138 protein to aggregate. Early time points (12-16 hours) gave very few cells with aggregates;  
139 while non-linearity, high confluency, and cell death became a concern at time points  
140 beyond 48 hours and concentrations greater than 750  $\mu$ M. The aggregation kinetics  
141 curve was used to define the extent of aggregation in the cell culture system and select  
142 optimum parameters to conduct the RNAi screen. Keeping a modest confluency and well-  
143 separated cells for ease of imaging, the screen was performed at a fixed concentration  
144 of 500  $\mu$ M CuSO<sub>4</sub> at 24 and 36 hours post induction.

145 We chose 900 genes (Suppl. Table 1A), based on their availability in the Open  
146 Biosystems Library (See Materials & Methods) to screen for modifiers that could change  
147 aggregation levels of VAP(P58S):GFP. A Gene Ontology (GO) chart (Fig. 2A) represents  
148 the biological process associated with these 900 genes, as defined by FlyBase. The  
149 genes were selected and categorized (Suppl. Table 1B) on the following basis. First,  
150 known *Drosophila* Orthologs of ALS loci (20 genes) and ALS related genes (36 genes)  
151 as tabulated in the online ALS database (ALSOD) were chosen. The next category  
152 included 273 genes from a VAP *Drosophila* GRN comprising of 406 genes (DEIVASIGAMANI  
153 *et al.* 2014). As *mTOR* was identified as a major interactor of VAP in our previous study  
154 (DEIVASIGAMANI *et al.* 2014), we chose 22 genes of the extended mTOR pathway. To  
155 explore the functional aspects of VAP(P58S), we also screened genes involved in lipid  
156 biosynthesis (92 genes) and FFAT motif interactors of VAP (34 genes). In order to identify  
157 a role of proteostasis in aggregation, we screened genes involved in unfolded protein  
158 response (123 genes), ubiquitin–proteasomal pathway (212 genes), and autophagy (88  
159 genes)

160 The images collected at the end of the screen (detailed in Materials and Methods)  
161 were analysed by an automated MATLAB analysis (see Materials & Methods; Fig. 2B).  
162 Based on average cell intensity, 150 targets (Suppl. Table 1C), and based on total cell  
163 intensity, 85 targets (Suppl. Table 1D) that modulated VAP(P58S):GFP aggregation  
164 kinetics were identified; 55 genes were found to be targets as per both parameters.  
165 Enrichment profile of target genes are plotted in Fig 2C and Suppl. Fig. 1C. ALS loci,  
166 notably *SOD1* and *TBPH*, were found as interesting modulators perturbing  
167 VAP(P58S):GFP aggregation. Targets belonging to the VAP genetic network, as defined  
168 by (DEIVASIGAMANI *et al.* 2014), were also enriched. As identified earlier (DEIVASIGAMANI *et*

169 *al.* 2014), components of the mTOR pathway also appeared to be key regulators of  
170 VAP(P58S):GFP aggregation. However, less than 10% of genes screened belonging to  
171 families associated with lipid biosynthesis and motif interactors, were identified as targets,  
172 suggesting lower functional relevance for VAP(P58S):GFP. Interestingly, genes related  
173 to ubiquitin proteasomal system such as ubiquitin ligases and proteasome components  
174 were enriched, as were the autophagy related genes such as *ATG7* and *ATG3*. From the  
175 unfolded protein response category, along with chaperones such as heat shock proteins,  
176 we also identified peptidyl prolyl isomerases as targets. Overall, in our primary targeted  
177 screen, we found various genetic interactors of wildtype VAP as modulators of  
178 VAP(P58S) aggregation as well; importantly, the uncovering of two ALS loci, *SOD1* and  
179 *TDP-43*, mTOR pathway genes such as *Rheb* and *S6K*, and genes enriched in ubiquitin  
180 proteasomal system as modulators of VAP(P58S) aggregation dynamics, lead us to  
181 develop an *in vivo* model to validate these genes and to understand mechanisms  
182 underlying these interactions in the animal.

183

184 *A model system for measuring VAP(P58S) aggregation in the Drosophila larval brain.*

185 In order to validate targets from the screen *in vivo*, we used the *UAS-GAL4* system  
186 to specifically overexpress wild-type *VAP* or *VAP(P58S)* in the brain using a pan-neuronal  
187 driver, *C155 (elav)* (RATNAPARKHI *et al.* 2008; DEIVASIGAMANI *et al.* 2014). Based on anti-  
188 VAP immunostaining, unlike wild-type VAP (Suppl. Fig. 2A), mutant VAP(P58S) formed  
189 distinct cellular puncta and could be used as a model to study aggregation in the animal  
190 (Suppl. Fig. 2B-D). These aggregates have been shown to be ubiquitinated and  
191 dominant-negative when expressed in muscle (Ratnaparkhi *et al.*, 2008). To develop a  
192 methodology for quantitation of aggregates in the brain (described in Materials &  
193 Methods), we used temperature as a means to increase GAL4 activity, which would  
194 increase VAP(P58S) dosage and possibly, aggregation. An increase in mean VAP(P58S)  
195 aggregation density was observed from 18 °C to 25 °C, but not significantly between 25  
196 °C and 28 °C (Suppl. Fig. 2H). Neuronal knockdown of VAP, using RNAi, in *C155-GAL4/+;*  
197 *UAS-VAP(P58S)/+* flies, at each temperature (Suppl. Fig. 2E-G), led to a significant  
198 decrease in corresponding aggregation density of the ventral nerve cord (Suppl. Fig. 2H).  
199 The above experiments suggest that at 25 °C, we could quantify changes in VAP(P58S)



200 aggregation density in the brain of the larvae, and here onwards, we use this system to  
201 further validate modifiers of aggregation identified from the cell-based screen.

202

### 203 *Drosophila SOD1 is a modifier of VAP(P58S) aggregation*

204 *SOD1*, first known ALS locus (ROSEN *et al.* 1993), has been implicated in both  
205 sporadic as well as familial cases and was our first choice for validation of the S2R+  
206 based screen, in the animal. We previously identified *SOD1* as a genetic interactor of  
207 *VAP* in a fly-based reverse genetics screen (DEIVASIGAMANI *et al.* 2014). Here, we  
208 individually knocked down *SOD1* using three independent RNAi lines in the *Cl55-GAL4/+;*  
209 *UAS-VAP(P58S)/+* background and observed a significant decrease in aggregation  
210 density in the ventral nerve cord (Fig. 3A, 3B, Suppl. Fig. 3A, 3C, 3D). This three-fold  
211 decrease in *VAP* aggregates was comparable to the reduction seen with *VAP* RNAi.  
212 Likewise, we overexpressed *SOD1* in the *Cl55-GAL4/+;* *UAS-VAP(P58S)/+* background.  
213 Here, however, we did not find a significant change in aggregation density (Fig. 3C, 3D  
214 Suppl. Fig. 3B, 3C, 3E). Taken together, these results suggest a need for a threshold  
215 level of *SOD1* to maintain *VAP(P58S)* inclusions.

216

### 217 *Oxidative stress reduces VAP(P58S) aggregation*

218 Enzymatically, *SOD1* metabolizes superoxide species to hydrogen peroxide,  
219 thereby preventing oxidative stress. A loss of function of *SOD1* would, in principle,  
220 increase ROS. We tested whether a chemical mimic, paraquat, which increases cellular  
221 ROS (CASTELLO *et al.* 2007; DRECHSEL AND PATEL 2008; COCHEME *et al.* 2011), could  
222 phenocopy the effect of *SOD1* knockdown. We treated the *VAP(P58S):GFP* stable line  
223 with non-lethal concentrations of 10 mM and 20 mM paraquat for 4 hours prior to  $\text{CuSO}_4$   
224 induction and found that paraquat could significantly reduce the fraction of cells showing  
225 GFP positive aggregates (Fig. 4A, Suppl. Fig. 4A) in a dose-dependent manner. Similarly,  
226 larvae with the genotype *Cl55-GAL4/+;* *UAS-VAP(P58S)/+* hatched, fed and grown on  
227 non-lethal concentration of 5 mM paraquat at 25 °C, showed a decrease in aggregation  
228 density in the third instar larval brain, reminiscent of the *SOD1* knockdown phenotype  
229 (Fig. 4B, Suppl. Fig. 4B). We also checked the effect of other ROS scavenging genes  
230 such as *SOD2* and *catalase* on *VAP(P58S)* aggregation. Knockdown of both these genes

231 resulted in a drastic reduction in aggregation density in the ventral nerve cord of *C155-*  
232 *GAL4/+; UAS-VAP(P58S)/+* larval brains. As seen with SOD1, overexpression of SOD2  
233 did not change aggregation density; however, catalase overexpression resulted in a  
234 fractional increase in aggregation density (Suppl. Fig 3F). These results strongly suggest  
235 a ROS dependent maintenance and/or stability of VAP(P58S) aggregates.

236 To confirm whether feeding of paraquat and loss of SOD1 function led to an  
237 increase in ROS levels in the larval brain, we measured the levels of oxidized proteins  
238 and lipids, using the oxyblot kit and quantitative mass spectrometry based lipidomics,  
239 respectively. Using the oxyblot assay, we found that feeding *C155-GAL4/+* larvae with  
240 increasing concentrations of paraquat (0 mM, 0.05 mM, 0.5 mM, 5 mM) was sufficient to  
241 increase ROS in the brain, observed as an increase in intensity of oxidized proteins as  
242 compared to unfed larvae (Suppl. Fig. 4C). As expected, neuronal knockdown of *SOD1*  
243 in presence of VAP(P58S) aggregates, led to a corresponding increase in intensity of  
244 oxidized proteins, demonstrating oxidative stress (Fig. 4C). We found that VAP(P58S)  
245 aggregation alone did not significantly change oxidized protein levels as compared to the  
246 *C155-GAL4/+* control (Fig. 4C). Unexpectedly, we found that overexpression of *VAP* in  
247 neurons led to a distinct increase in oxidation of proteins (Fig. 4C).

248 To further bolster our findings, we measured levels of oxidized phospholipids in  
249 larval brains (TYURINA *et al.* 2000; KAMAT *et al.* 2015; KORY *et al.* 2017). On feeding *C155-*  
250 *GAL4/+* larvae with 5 mM paraquat, we enriched and detected 9 oxidized  
251 polyunsaturated fatty acids (PUFAs), belonging to phosphatidylserine (PS) and  
252 phosphatidylethanolamine (PE) (Fig. 4D, Suppl. Table 2) families of phospholipids, which  
253 were significantly elevated in larval brains, compared to the unfed control. PUFA  
254 containing oxidatively damaged phospholipids showed a mass addition of +16 (denoted  
255 as ox-) or +18 (denoted as hy-) to the parent phospholipid, as a consequence of addition  
256 of different ROS. Of note, the parent or precursor phospholipids did not change in  
257 concentration, and the concentrations of the oxidized phospholipids were less than 1%  
258 of the parent or precursor phospholipids. We found a similar elevation in concentrations  
259 of oxidized phospholipids in *C155-GAL4/+; UAS-VAP(P58S)/+; UAS-SOD1<sub>i</sub>/+*, but not  
260 in *C155-GAL4/+; UAS-VAP(P58S)/+* which was equivalent to *C155-GAL4/+* control (Fig.  
261 4D, Suppl. Table 2). This elevation in oxidized phospholipids was found to be inversely

262 correlated with corresponding fold change in aggregation density (Suppl. Fig. 4D).  
263 Interestingly, we found, as suggested by the oxyblot data, overexpression of *VAP* had a  
264 curious effect of increasing oxidation of lipids, indicating that wild type *VAP* has a cryptic  
265 yet important role in regulating ROS levels. Taken together, these results indicate that  
266 ROS initiates processes that aid clearance *VAP*(P58S) aggregates, and is in turn  
267 regulated by *VAP* wildtype levels in the cell.

268

### 269 *ROS activates proteasomal machinery*

270 We further investigated protein degradation mechanisms that may be activated in  
271 response to ROS leading to the clearance of *VAP*(P58S) aggregates. In order to test  
272 whether the proteasomal machinery was responsible for reduction in aggregation, we  
273 hatched, fed, and grew larvae with proteasomal inhibitor 5 $\mu$ M MG132, and dissected the  
274 brains at the wandering third instar stage and analysed the aggregation density. Unfed  
275 *C155-GAL4/+; UAS-VAP(P58S)/+; UAS-SOD1\_i/+*, as expected, showed reduced  
276 aggregation density (Fig. 5C), as compared to unfed control (Fig. 5A, 5E). Upon MG132  
277 feeding, *C155-GAL4/+; UAS-VAP(P58S)/+; UAS-SOD1\_i/+*, showed a complete rescue  
278 of *VAP*(P58S) aggregation (Fig. 5D, 5E). Fed *C155-GAL4/+; UAS-VAP(P58S)/+; UAS-*  
279 *SOD1\_i/+* also showed an enhanced aggregation density as compared to fed *C155-*  
280 *GAL4/+; UAS-VAP(P58S)/+* (Fig. 5B, 5E). Aggregates in presence of ROS (with *SOD1*  
281 knockdown) and proteasomal inhibition (with MG132) appeared to be predominantly  
282 smaller, scattered and mislocalized around the nuclear membrane/ER as compared to  
283 the respective controls (Fig. 5D'). The localization of the aggregates suggest that may be  
284 residing in the Juxta Nuclear Quality Control compartment (JUNQ)-like compartment  
285 (OGRODNIK *et al.* 2014). These results indicate that the proteasomal machinery is  
286 facilitated in presence of ROS for active degradation of *VAP*(P58S) aggregates (Fig 5F).  
287 However, fed *C155-GAL4/+; UAS-VAP(P58S)/+* larvae (Fig. 5A) did not show  
288 accumulation of aggregation as compared to unfed control (Fig. 5B, 5E), indicating other  
289 mechanisms may be at play to maintain the aggregation density.

290

291

292

293 *mTOR inhibition lowers VAP(P58S) aggregation but not via autophagy*

294 We examined whether aggregates could be cleared via autophagy in the third  
295 instar larval brain. We inhibited the mTOR pathway by feeding *C155-GAL4/+; UAS-*  
296 *VAP(P58S)/+* larvae with 200nM rapamycin (HEITMAN *et al.* 1991) as described  
297 (DEIVASIGAMANI *et al.* 2014), thereby activating autophagy (NODA AND OHSUMI 1998), and  
298 observed a drastic clearance of aggregation in the ventral nerve cords as compared to  
299 unfed controls (Fig. 6A, 6B, 6C). When *Tor* transcripts were reduced using RNAi in *C155-*  
300 *GAL4/+; UAS-VAP(P58S)/+*, a similar decrease in aggregation density was found (Fig.  
301 6D, 6E, 6F). However, when autophagy was induced directly via overexpression of Atg1  
302 in *C155-GAL4/+; UAS-VAP(P58S)/+*, we did not observe clearance of aggregation (Fig.  
303 6G, 6H, 6I). This suggests that mTOR signalling may perturb downstream effectors other  
304 than Atg1 which may affect VAP(P58S) aggregation dynamics (Fig 6J).

305

306 *mTOR inhibition promotes proteasomal clearance of VAP(P58S) aggregation via ROS*

307 We first decided to check whether clearance of aggregates with mTOR inhibition  
308 correlated with increase in ROS, as in the case of *SOD1* knockdown. We found that levels  
309 of several species of oxidized phospholipids were indeed higher with *Tor* knockdown with  
310 or without neuronal overexpression of VAP(P58S) in third instar larval brains to levels  
311 similar to *SOD1* knockdown (Fig. 7A). mTOR pathway downregulation has recently been  
312 shown to activate not only autophagy but also ubiquitin proteasomal machinery (ZHAO *et*  
313 *al.* 2015) via Mpk1/ERK5 pathway in yeast and humans (ROUSSEAU AND BERTOLOTTI  
314 2016). We tested whether ROS upregulation with *Tor* knockdown could be inducing  
315 proteasomal clearance of VAP(P58S) aggregation by feeding *C155-GAL4/+; UAS-*  
316 *VAP(P58S)/+; UAS-TOR\_i/+* with 5 $\mu$ M MG132 (Fig 7B, 7C-E). Although there was a  
317 significant decrease in aggregation density with *Tor* knockdown (Fig. 7D), we found only  
318 a slight recovery of aggregation in MG132-fed animals (Fig. 7E) as compared to unfed  
319 *C155-GAL4/+; UAS-VAP(P58S)/+* control flies (Fig. 7C). This recovery appeared to be far  
320 less dramatic than that seen in the case of *SOD1* knockdown. Taken together, these  
321 results indicate that in context of ROS, proteasomal degradation could be the major  
322 pathway responsible for clearance of VAP(P58S) aggregation (Fig. 7F), although other

323 downstream effectors of mTOR signalling, including autophagy, cannot be conclusively  
324 ruled out as additional mechanisms.

325 We also explored the possible relationship between *VAP* and ROS at a  
326 transcriptional level. Larvae of the control, *C155-GAL4/+* genotype were hatched and fed  
327 on 5mM paraquat, and the brains were dissected at the wandering third instar larval stage.  
328 The levels of endogenous *VAP* and *SOD1* mRNA, in response to ROS, were measured  
329 using qPCR in control larval brains. We found that endogenous *VAP* mRNA levels were  
330 lower in the presence of high levels of ROS (Suppl. Fig. 4E), while *SOD1* mRNA levels  
331 remained unchanged (Suppl. Fig. 4F). This result may indicate the presence of a negative  
332 feedback loop wherein *VAP* overexpression leads to accumulation of ROS (Fig. 4C-D),  
333 which in turn downregulates endogenous *VAP* transcription.

334

335

## 336 Discussion

337

338 *A targeted RNAi screen uncovers SOD1, TDP43 and TOR signalling elements as targets*  
339 *to understand dynamics of VAP(P58S) aggregation*

340 *Drosophila* S2R+ cell based whole genome RNAi screens serve as powerful tools  
341 due of the relative ease with which transcript knockdown can be achieved (ECHEVERRI  
342 AND PERRIMON 2006). Similar systems have been used for identifying modifiers of  
343 aggregation of Huntingtin protein (ZHANG *et al.* 2010). Our screen was aimed at enriching  
344 genes that are known players in ALS, *VAP* interactors and proteostasis. First and  
345 foremost, we found ALS loci, *SOD1* and *TDP-43* as modifiers of *VAP*(P58S) aggregation,  
346 which we had previously identified as *VAP* genetic interactors (DEIVASIGAMANI *et al.* 2014).  
347 In this study, we have explored the interaction between *SOD1* and *VAP*, while *TDP-43*  
348 also serves as an exciting candidate for further investigation. *TDP-43* has been shown to  
349 perturb membrane-associated mitochondrial (TURNER *et al.* 2008) sites that are  
350 maintained by *VAPB*-*PTPIP51* interactions in mammalian cell culture (STOICA *et al.* 2014).  
351 Additionally, *TDP-43* proteinopathy has been identified in motor neurons of mice models  
352 of *VAP*(P58S) aggregation (TUDOR *et al.* 2010). *TDP-43* driven neurodegeneration has  
353 also been shown to be modulated by oxidative stress related MAP kinase pathways in a  
354 *Drosophila* screen (ZHAN *et al.* 2015) and associated with Nrf2 dependent antioxidant

355 pathway (MOUJALLED *et al.* 2017). In addition to SOD1, we have also identified other ROS  
356 related genes such as peroxiredoxin V, NADH dehydrogenase, cytochrome c oxidase,  
357 that localise to the mitochondria, perturbation of which will lead to oxidative stress,  
358 potentially affecting aggregation kinetics of VAP(P58S).

359 Secondly, we enriched a subset of targets involved in protein degradation, UPS  
360 and autophagy, an *in vivo* validation of which would shed light on the how these  
361 aggregates are compartmentalized and managed in the neurons. Thirdly, this screen  
362 highlighted specific chaperones that could be involved in the misfolding and formation of  
363 VAP(P58S) aggregates providing insight into the initiation of the disease condition. Most  
364 importantly, through our previous study (DEIVASIGAMANI *et al.* 2014), and our cell-based  
365 screen followed by subsequent experimentation, we have established mTOR signalling  
366 as a strong modulator of VAP(P58S) aggregation. mTOR signalling responds and  
367 integrates signals from nutrients, growth factors, energy, and stress, regulates cellular  
368 proteostasis, thus contributing to age-related neurodegenerative diseases (PERLUIGI *et al.*  
369 2015), making it an attractive target for further investigation in ALS pathogenesis. Indeed,  
370 rapamycin, a TORC1 inhibitor, is now being used for phase-II clinical trials for ALS  
371 (MANDRIOLI *et al.* 2018). Lastly, through our screen, targeting processes involved in  
372 neurodegeneration, we have identified interactions that point towards a role for VAP as a  
373 contributor to a common gene regulatory network (GRN), in agreement with several  
374 examples in literature (TUDOR *et al.* 2010; VAN BLITTERSWIJK *et al.* 2012; PRAUSE *et al.*  
375 2013; DEIVASIGAMANI *et al.* 2014; STOICA *et al.* 2014; STOICA *et al.* 2016; PAILLUSSON *et al.*  
376 2017). When we compared our list of targets with the results from another fly-based  
377 screen for VAP(P58S)-induced eye degeneration (SANHUEZA *et al.* 2015), we found no  
378 overlap, possibly because of differences in sets of genes screened, cell types, and  
379 phenotypes visualized.

380

381 *An ROS dependant physiological mechanism that triggers proteasomal clearance of*  
382 *VAP(P58S) aggregation*

383 In our study, we have used a dosage-dependent pan-neuronal GAL4 expression  
384 of VAP(P58S) in order to study changes in aggregation in the third instar larval brain. We  
385 found two targets, SOD1 and mTOR (DEIVASIGAMANI *et al.* 2014), downregulation of

386 which, led to a decrease in VAP(P58S) aggregation accompanied by oxidative stress. We  
387 identified a role of ROS in upregulating the proteasomal machinery and, thereby  
388 facilitating the degradation of misfolded VAP(P58S) protein/aggregates (Integrated  
389 Model; Fig. 8A). However, in absence of ROS, we did not find any change in aggregation  
390 density upon pharmacological proteasomal inhibition. This is consistent with the cell  
391 culture studies that point towards the downregulation of Ubiquitin-proteasome system  
392 (UPS) with VAP(P58S) aggregation as a dominant negative effect on wild type VAP  
393 function (KANEKURA *et al.* 2006; GKOGKAS *et al.* 2008; PAPIANI *et al.* 2012; GENEVINI *et al.*  
394 2014). Overexpression of VAP(P58S) or loss of VAP in *Drosophila* has been shown to  
395 enhance ER stress in the adult brains and may be a result of suspended proteasomal  
396 degradation (TSUDA *et al.* 2008; MOUSTAQIM-BARRETTE *et al.* 2014). In mice, VAP(P56S)  
397 aggregates have been shown to represent an ER-Quality Control (ERQC) compartment  
398 that develops as a result of a debilitated ER-Associated Degradative (ERAD) pathway  
399 (KUIJPERS *et al.* 2013). Indeed, VAP has been shown to interact with UPR sensor AFT6  
400 in mice and the ERAD complex thereby regulating proteostasis and lipid homeostasis in  
401 HeLa cell lines (Gkogkas *et al.*, 2008; Ernst *et al.*, 2016). Studies in mammalian cell lines  
402 suggest that VAP(P56S) is ubiquitinated, aggregates on the ER membrane and is cleared  
403 by the AAA+ valsoxin containing protein (VCP)/p97, which interacts with Fas associated  
404 factor 1 (FAF1) and may use the FFAT motif in FAF1 as an adapter to interact with VAP  
405 (PAPIANI *et al.* 2012; BARON *et al.* 2014). In *Drosophila*, VAP has been shown to be  
406 essential for ER homeostasis by maintaining lipid transport, whereas the mutant VAP flies  
407 show accumulation of ubiquitinated and membrane proteins in neuronal cells  
408 (MOUSTAQIM-BARRETTE *et al.* 2014). Hence, although ER stress is build up with  
409 VAP(P58S) aggregation, it does not lead to subsequent oxidative stress, as shown in our  
410 results. This suggests that ROS enhances the proteasomal degradation of VAP(P58S)  
411 through an ER stress-independent mechanism. Although neuronal VAP(P58S)  
412 aggregates appeared to be non-toxic to flies *per se*, our study highlights the effects of  
413 ROS on the dynamics of VAP(P58S) from misfolded protein to aggregate formation and  
414 subsequent clearance.

415

416

417 *TOR signaling regulates VAP(P58S) dynamics by a UPS dependent and Atg1*  
418 *independent mechanisms.*

419 We previously identified mTOR pathway as a strong regulator of both VAP and  
420 VAP(P58S) phenotypes at the neuromuscular junction (DEIVASIGAMANI *et al.* 2014). Here,  
421 we have shown that inhibition of mTOR pathway also reduces VAP(P58S) aggregation  
422 levels in third instar larval brains in presence of ROS. mTOR pathway downregulation is  
423 known to activate autophagy (NODA AND OHSUMI 1998), a process that has been shown  
424 to reduce mutant huntingtin fragments (RAVIKUMAR *et al.* 2004) and amyloid- $\beta$  levels  
425 (SPILMAN *et al.* 2010) in mice models. Autophagy has been suggested to be upregulated  
426 in presence of VAP(P56S) aggregates that also colocalize with the autophagic marker,  
427 p62, in mice (LARROQUETTE *et al.* 2015). With *VAP* knockdown in cell culture, autophagy  
428 is upregulated due to the loss of calcium homeostasis that arises with the disruption of  
429 ER-mitochondrial contact sites (GOMEZ-SUAGA *et al.* 2017a; GOMEZ-SUAGA *et al.* 2017b).  
430 However, VAP is also suggested to have a role in autophagosomal biogenesis through  
431 direct interaction with autophagy proteins (ZHAO *et al.* 2018). In our study, we do not  
432 observe any clearance of VAP(P58S) aggregation with activation of Atg1, indicating that  
433 clearance observed with mTOR inhibition may be an effect of one or more of its  
434 downstream processes (Fig. 8A).

435 mTOR and SOD1 have been shown to be genetic interactors in *Drosophila* with  
436 mTOR inhibition enhancing the lifespan defect incurred with SOD1 knockdown (SUN *et al.*  
437 *et al.* 2012). Recently, mTOR has been directly shown to regulate SOD1 activity by its  
438 phosphorylation based on nutrient availability in yeast and mammalian cells (TSANG *et al.*  
439 2018). Although this phosphorylation site does not appear to be conserved in *Drosophila*,  
440 this study demonstrates the role of mTOR pathway in regulating ROS via SOD1. mTOR  
441 inhibition, specifically, mTORC1 has also been shown to activate proteasomal  
442 degradation independent of its other targets, such as, 4EBP, S6K and Ulk (CAVANAUGH  
443 *et al.* 2006; ZHAO *et al.* 2015). An evolutionarily conserved regulation of components of  
444 proteasomal assembly by mTORC1 via Mpk1/ERK5 has been reported in yeast as well  
445 as mammalian cell culture (ROUSSEAU AND BERTOLOTI 2016). ERK5 signalling has been  
446 implicated in neuroprotective roles in response to mild levels of oxidative stress  
447 (CAVANAUGH *et al.* 2006; SU *et al.* 2014). These studies suggest that ROS regulation by



448 mTOR inhibition via SOD1 and ERK5, serves as a plausible mechanism for the  
449 proteasomal degradation of VAP(P58S) protein/aggregation, and by extension, the  
450 rescue of VAP(P58S) NMJ phenotype (DEIVASIGAMANI *et al.* 2014) (Fig. 8B).

451

#### 452 *Increase in ROS by VAP, but not VAP(P58S) expression*

453 SOD1-associated elevation in ROS levels and oxidative stress is suggested as a  
454 plausible factor of motor neuron death in ALS (BARBER *et al.* 2006; SACCON *et al.* 2013).  
455 Teuling *et al.*, 2007 (TEULING *et al.* 2007) have shown that VAPB protein levels decrease  
456 in an age-dependent manner in a mouse model of SOD1-G93A, providing the first  
457 evidence of a link between *ALS1* and *VAP/ALS8*. We now find that overexpressed VAP,  
458 unlike VAP(P58S), promotes the accumulation of ROS in the system. This is consistent  
459 with a study that shows lowered ROS in a *vpr* (VAP ortholog) mutant of *C. elegans* in  
460 response to increased mitochondrial connectivity and altered function (HAN *et al.* 2012).  
461 VAP neuronal overexpression in *Drosophila* has also been shown to increase bouton  
462 number (PENNETTA *et al.* 2002) similar to SOD1 mutant phenotype at the NMJ (MILTON *et*  
463 *al.* 2011), and is correlated with increased ROS in both scenarios. VAP may be important  
464 in regulating pathways that respond to changes in ROS levels, such as mTOR and ERK  
465 pathways that can regulate UPS (ROUSSEAU AND BERTOLOTTI 2016). VAP also modulates  
466 ERAD (and UPS), via its interaction with VCP and FAF1 (PAPIANI *et al.* 2012; BARON *et*  
467 *al.* 2014). We hypothesize that the interaction between VAP and ROS could lead to  
468 crosstalk between these pathways regulating global proteostasis (Fig. 8B).

469

#### 470 *ROS may regulate VAP levels by regulating VAP transcription*

471 In our study, we have found that in presence of ROS, *VAP* transcription is  
472 downregulated in wild type flies. We had previously shown that *SOD1* knockdown  
473 rescues VAP macrochaetae phenotype (DEIVASIGAMANI *et al.* 2014), which may be a  
474 consequence of excessive ROS accumulation, and subsequent downregulation of VAP  
475 levels and function. Two independent studies (QIU *et al.* 2013; KIM *et al.* 2016), that  
476 overexpressed VAPB in *ALS1* (SOD1-G93A) mice as an attempt at rescuing ALS  
477 defects, found contradictory observations, owing mainly to differences in expression  
478 levels of the protein. *VAPB* mRNA levels are known to be lowered in spinal cords of

479 patients with sporadic ALS (ANAGNOSTOU *et al.* 2010), as well as in iPSC- derived motor  
480 neurons from ALS8 patients (MITNE-NETO *et al.* 2007). It has also been reported that  
481 VAPB staining in motor neurons of sporadic patients is increased showing “punctate  
482 accumulation” that colocalize with early endosomal marker, Rab5 (SANHUEZA *et al.* 2015).  
483 Based on our results and taking into consideration earlier observations (TEULING *et al.*  
484 2007; ANAGNOSTOU *et al.* 2010; DEIVASIGAMANI *et al.* 2014), we submit that in the ALS  
485 disease scenario, increased VAP accumulates ROS that initiates a negative feedback  
486 loop resulting in downregulation of VAP, at the transcript level (Fig. 8A). It remains to be  
487 tested whether ROS-activated pathways such as MAP kinase pathways or mTOR  
488 pathway, could directly control VAP expression. This VAP/ROS regulation that we have  
489 uncovered may have significant implications in ALS pathogenesis for both sporadic and  
490 familial ALS.

491

492 In Summary, we find that the dynamics of VAP(P58S) neural aggregates, a  
493 species intimately linked to disease in the human context, is sensitive to levels of ROS.  
494 Change in physiological levels of ROS appear to dictate the equilibrium between the  
495 aggregated and non-aggregated forms. The cellular levels of ROS are themselves  
496 dictated by well characterized regulatory mechanisms that include ROS generators and  
497 scavengers. As shown in this study, TOR signalling and VAP/VAP(P58S) expression  
498 levels would contribute to the extent of aggregation, and may act as regulatory feedback  
499 loops to regulate physiological ROS levels. SOD1, VAP/ALS8, TOR and ROS are part of  
500 physiological regulatory circuit that maintains levels of VAP(P58S) aggregates.

## 501 **Materials & Methods**

502 Generation of constructs and dsRNA: The cDNA sequence of VAP and VAP(P58S)  
503 mutant were cloned into *pRM-GFP* plasmid (BHASKAR *et al.* 2000) to generate both N and  
504 C-terminal GFP fusions, using the *EcoR1* restriction site. The pRM-GFP vector has GFP  
505 cloned into pRM-HA3 vector at the *BamHI* site. 500  $\mu$ M CuSO<sub>4</sub> was used to drive  
506 expression in S2R<sup>+</sup> cells after transient transfections. dsRNA for the secondary screen  
507 was generated using MEGAscript® T7 Kit (AM1333) by ThermoFisher Scientific.  
508 Template for dsRNA was generated by using cDNA as template, prepared from flies.  
509 Primers for the same were ordered from Sigma.

510 Handling of Schneider cells: *Drosophila* S2R<sup>+</sup> cells were maintained in Schneider cell  
511 Media (#21720-024; GIBCO) with 10% Heat inactivated Fetal Bovine Serum (FBS,  
512 #10270; GIBCO). Batches of cells were frozen in 10% DMSO (D2650; Sigma) and stored  
513 in liquid nitrogen following DRSC protocol (<http://www.flyrnai.org/DRSC-PRC.html>). In  
514 general, after reviving, cells were discarded after 25-30 passages. Cells were maintained  
515 at 23° C, and split every 4 days at a ratio of 1:5.

516 Cell culture and generation of S2R<sup>+</sup> stable lines: Stable S2R<sup>+</sup> cell lines were generated  
517 by co-transfecting with pRM-HA3 constructs of VAP:GFP, VAP(P58S):GFP or GFP along  
518 with pCo-Hygro in 20:1 ratio, using Effectene (QIAGEN) and/or Mirus TransIT 2020 (MIR  
519 5400), and selected under 250  $\mu$ g/ml of hygromycin (Sigma) for 10-15 passages. Stable  
520 as well as transiently transfected cell lines were induced to express the gene of interest  
521 under a metallothionein promoter using increasing concentrations 250 $\mu$ M, 500 $\mu$ M, 750 $\mu$ M  
522 and 1000 $\mu$ M of copper sulphate and analysed at 12, 24, 36 and 48 hours post induction.  
523 Transient transfections assays were performed using Mirus TransIT-2020 (MIR 5400)  
524 transfection reagent. Protocol for dsRNA knockdown assay was modified from (ROGERS  
525 AND ROGERS 2008). Fixation, DAPI staining and imaging was done using EVOS FL Auto  
526 Cell Imaging system. Super-resolution images of fixed VAP:GFP and VAP(P58S):GFP  
527 cells were acquired using Leica SR GSD 3D system.

528 Western blotting: Cells were centrifuged at 3000 rpm for 5 minutes in Eppendorf 5414R  
529 centrifuge. The pellet was resuspended in 20  $\mu$ l of supernatant and boiled with 1X SDS  
530 Dye at 95°C. Samples were centrifuged again at 10000 rcf for 10 minutes. Cell extracts  
531 were separated by 12% SDS-PAGE and transferred onto 0.45  $\mu$ m PVDF membrane

532 (Millipore). Membranes were blocked for 1 hour in 5% skimmed milk in 1X TBS containing  
533 0.1% Tween-20 at room temperature and probed with 1:10,000 diluted mouse anti-  
534 Tubulin (T6074; Sigma-Aldrich) and 1:5,000 diluted mouse anti-GFP (Roche life science),  
535 overnight at 4 °C (12 hours). Anti-rabbit and anti-mouse secondary antibodies conjugated  
536 to horseradish peroxidase (Pierce) were used at a dilution of 1:10,000 for 1 hour at room  
537 temperature. Blots were developed with Immobilon Chemiluminescent Substrate  
538 (LuminataClassico Western HRP substrate from Millipore) using a LAS4000 Fuji imaging  
539 System.

540 GO analysis: The list of genes and Gene Ontology (GO) information was obtained based  
541 on Flybase (<http://flybase.org>) (MARYGOLD *et al.* 2013) entries. Genes were categorized  
542 manually in the broad categories of ALS genes, VAP interactome (DEIVASIGAMANI *et al.*  
543 2014) and proteostasis. List of ALS loci and ALS related genes were obtained from  
544 <http://alsod.iop.kcl.ac.uk/> (WROE *et al.* 2008). The *Drosophila melanogaster* homologs of  
545 these ALS genes were identified using Ensembl biomart tool  
546 (<http://asia.ensembl.org/biomart/martview>) and Flybase batch download tool. Human  
547 orthologs of the target genes listed in Suppl. Table 1C and 1D were identified using  
548 DRSC Integrative Ortholog Prediction Tool (DIOPT) ([http://www.flyrnai.org/cgi-](http://www.flyrnai.org/cgi-bin/DRSC_orthologs.pl)  
549 [bin/DRSC\\_orthologs.pl](http://www.flyrnai.org/cgi-bin/DRSC_orthologs.pl)).

550 High through-put screen, and image acquisition: The screen was performed at the  
551 screening facility at CCAMP-NCBS, Bangalore (<http://ccamp.res.in/HTS-HCI>). dsRNA for  
552 the high throughput screen was generated and plated into sixteen 384 well plates by  
553 Chromous Biotech, Bangalore in preparation for the experiment. The library used as a  
554 template for generating dsRNAs was procured from Open Biosystems (RDM1189 and  
555 RDM4220). 50 µl of cells ( $3 \times 10^6$  / ml) were plated in each well for the 384 well flat  
556 bottom plates obtained from Corning. Each target dsRNA knockdown experiment was  
557 done in triplicate, randomly arranged in the 384 well plate. The cells were treated with 10  
558 µg/ml of dsRNA for 48 hours, followed by induction with 500 µM CuSO<sub>4</sub>. The cells were  
559 fixed and imaged at 24 and 36 hours post CuSO<sub>4</sub> induction. Fixation was done with 4%  
560 PFA in 1X PBS, washed twice with 1X PBS, treated with 0.05µg/ml DAPI and followed  
561 with two washes with 1X PBS. Each plate contained 7 negative controls occupying 42  
562 wells. 114 unique genes were screened in each plate. Few genes were kept as overlap

563 between multiple plates to check for their consistency and reproducibility. Imaging for the  
564 high throughput screen was performed by THERMO Array Scan VTI HCS system. Dual-  
565 channel images from ten fields in each well were captured using a 20X air objective and  
566 an EMCCD camera. The FITC (488nm) channel was used for imaging VAP(P58S):GFP  
567 aggregates and the DAPI (405nm) channel for imaging cell nuclei. 10 fields were imaged  
568 in each well and around 400 cells were imaged per field. In well triplicates, around 12,000  
569 cells were imaged for each dsRNA knockdown.

570 High throughput data analysis: Images from the FITC and DAPI channels in each site  
571 were read using the Bio-Formats MATLAB toolbox (LINKERT *et al.* 2010) and were  
572 processed using custom MATLAB scripts. The segmentation was done using the DAPI  
573 images and the extraction of pixel intensities was done on the FITC channel. Illumination  
574 correction was performed as a pre-processing step on the DAPI Images and individual  
575 nuclei were segmented after a contrast stretching routine was applied. The identified  
576 objects were further filtered for outliers, based on a size-based cutoffs and the individual  
577 8-connected components were labelled as separate nuclei. Under 20x magnification we  
578 estimated the cellular radius to be around 10 pixels corresponding to 5  $\mu\text{m}$ . Thus, labelled  
579 cellular objects (ROIs), were obtained by dilating the centroids of each nuclei by 10 pixels.  
580 Around 400 ROIs were obtained from each field consistent with manually counted cells  
581 in these images. The resultant ROI's were further filtered for clumps and out of focus  
582 objects. The GFP intensities were obtained for these ROI's post a local background  
583 correction of the FITC images (with a disk size of 3 pixels). Average and total intensities  
584 were calculated from the pixel data obtained from every cell/ROI from these FITC images.  
585 A Kolmogorov-Smirnov-like (KS) statistic was used to assign Z-scores to each gene on  
586 plate as reported by (DEY *et al.* 2014). A statistically significant threshold was obtained  
587 for the triplicate data using monte-carlo simulations. Genes were classified as hits, if it  
588 occurred two or more times above a given Z-score threshold. The false positive rates for  
589 both parameters at both time points was zero. The false negative rates for average  
590 intensity for 24 hours- time point was 0.2523 and for 36 hours- time point was 0.361. The  
591 false negative rates for total intensity for 24 hours- time point was 0.3838 and for 36 hours-  
592 time point was 0.3164.

593 Fly husbandry and brain aggregation assay: Fly lines were maintained on standard corn  
594 meal agar medium. *UAS-GAL4* system was used for overexpression of transgenes. *UAS-*  
595 *VAP* wildtype, *UAS-VAP(P58S)* and *C155-GAL4* lines used for fly experiments have  
596 been described earlier (RATNAPARKHI *et al.* 2008; DEIVASIGAMANI *et al.* 2014). Canton S  
597 flies were used as wildtype control. *UAS-VAP\_i* (27312), *UAS-SOD1\_i* (34616, 29389,  
598 36804) and *UAS-TOR\_i* (35578) where the suffix 'i' indicates an RNAi line, and *UAS-*  
599 *SOD1* (24750, 33605) were obtained from BDSC. Clone for UAS-FLAG-HA tagged  
600 SOD1 in pUAS vector was obtained for expression in *Drosophila* from DGRC and  
601 injected in the NCBS-CCAMP transgenic facility. *UAS-Atg1* line was kindly provided by  
602 Dr. Chen, Academia Sinica; the line was validated in the wing using *ptc-GAL4* as  
603 described (CHEN *et al.* 2008). Experimental Crosses were set at 18°C, 25°C or 28°C, as  
604 indicated. Brains were dissected from third instar larvae and processed for  
605 immunostaining assay. 4% paraformaldehyde containing 0.1% Triton-X was used for  
606 fixation followed by washes with 1X PBS. Blocking treatment and washes were  
607 performed with 0.3% Triton-X with 2% BSA. Brains were stained with 1:500 diluted anti-  
608 VAP antibody and 1:1000 anti-rabbit secondary (Invitrogen) was used. Z-stacks of five-  
609 ten brains for each sample were imaged under 63X oil objective of Zeiss LSM 710  
610 Confocal Microscope. The number of aggregates were quantified per cubic micron of the  
611 ventral nerve cord, defined as “aggregation density” using the Huygen professional  
612 software. The high intensity puncta were considered as aggregates. An arbitrary  
613 threshold was set for controls as well as for test samples that achieved removing low  
614 intensity background signal emitted by the tissue, along with separation of high intensity  
615 puncta that were adjacent to one another. An object filter was used to remove objects of  
616 size greater than 1000 pixels and garbage size smaller than 10 pixels was excluded.  
617 Three 3D region of interests of fixed size were drawn along the tip of the ventral nerve  
618 cord and the number of aggregates were counted from each of these ROIs and averaged  
619 for each animal. The volume (in cubic micron) of ROI depicting the thickness of the brain  
620 tissue was measured as the range of the z-stack of the image. The aggregation density  
621 obtained for each brain has been normalised to the mean of the control group, *C155-*  
622 *GAL4; UAS-VAP(P58S)* (+ 0.25% DMSO, in case of DMSO-soluble drug experiments)

623 and plotted as “normalized aggregation density” in each graph. Student t-test and one-  
624 way ANOVA were used to measure statistical significance.

625 Drug treatment: Cells were exposed to 10mM and 20mM Paraquat dichloride hydrate  
626 (500mM, 36541-Sigma-aldrich) for 24 hours prior to protein induction with 500µM copper  
627 sulphate. Fixation, DAPI staining and imaging was done using EVOS FL Auto Cell  
628 Imaging system. For flies, 10-12 virgins were placed with CS males, for each genotype  
629 and animals were allowed to mate for 24 hours and transferred to standard cornmeal fly  
630 media containing paraquat (0.05mM, 0.5mM, and 5mM), MG132 (5µM), rapamycin  
631 (200nM) or DMSO (0.25%).

632 Oxyblot assay: Third instar larval brains were lysed in RIPA containing 50 mM DTT and  
633 centrifuged at 10000 rcf. The lysate containing 10µg of protein was incubated with 2,4-  
634 dinitrophenylhydrazine (DNPH) to derivatize the carbonyl groups of oxidized proteins with  
635 2,4-dinitrophenylhydrazone (DNP-hydrazone) as described by the Oxyblot Protein  
636 Oxidation Detection Kit (S7150) from EMD Millipore. The derivatized protein lysate was  
637 separated on a 12% SDS-PAGE and transferred onto 0.45 µm PVDF membrane  
638 (Millipore). Oxidized protein levels in the lysate were detected by probing with anti-DNP  
639 antibody on western blot as per the Oxyblot Protein Oxidation Detection Kit manual.

640 Lipid extraction and targeted LC-MS lipidomics: All MS quantitation phospholipid  
641 standards were purchased from Avanti Polar Lipids Inc., USA. The brain samples were  
642 washed with PBS (x 3 times), and transferred into a glass vial using 1 mL PBS. 3 mL of  
643 2:1 (vol/vol) CHCl<sub>3</sub>: MeOH with the internal standard mix (1 nmol 17:1 FFA, 100 pmol  
644 each of 17:0-20:4 PS, 17:0-20:4 PC, 17:0-20:4 PE, and 17:0-20:4 PA) was added, and  
645 the mixture was vigorously vortexed. The two phases were separated by centrifugation  
646 at 2800 x g for 5 minutes. The organic phase (bottom) was removed, 50 µL of formic acid  
647 was added to acidify the aqueous homogenate (to enhance extraction of phospholipids),  
648 and CHCl<sub>3</sub> was added to make up 4 mL volume. The mixture was vortexed, and separated  
649 using centrifugation described above. Both the organic extracts were pooled, and dried  
650 under a stream of N<sub>2</sub>. The lipidome was re-solubilized in 200 µL of 2:1 (vol/vol) CHCl<sub>3</sub>:  
651 MeOH, and 20 µL was used for the targeted LC-MS analysis (KAMAT *et al.* 2015). All the  
652 phospholipid species analyzed in this study were quantified using the multiple reaction  
653 monitoring (MRM) method on an AbSciex QTrap 4500 LC-MS with a Shimadzu Exion-LC

654 series quaternary pump. All data was collected using the Acquisition mode of the Analyst  
655 software, and analyzed using the Quantitate mode of the same software. The LC  
656 separation was achieved using a Gemini 5U C-18 column (Phenomenex, 5  $\mu$ m, 50 x 4.6  
657 mm) coupled to a Gemini guard column (Phenomenex, 4 x 3 mm, Phenomenex security  
658 cartridge). The LC solvents were: For positive mode: buffer A: 95:5 (vol/vol) H<sub>2</sub>O: MeOH  
659 + 0.1% formic acid + 10 mM ammonium formate; and buffer B: 60:35:5 (vol/vol) iPrOH:  
660 MeOH: H<sub>2</sub>O + 0.1% formic acid + 10 mM ammonium formate, For Negative mode: buffer  
661 A: 95:5 (vol/vol) H<sub>2</sub>O: MeOH + 0.1% ammonium hydroxide; and buffer B: 60:35:5 (vol/vol)  
662 iPrOH: MeOH: H<sub>2</sub>O + 0.1% ammonium hydroxide. All the MS based lipid estimations was  
663 performed using an electrospray ion source, using the following MS parameters: ion  
664 source = turbo spray, collision gas = medium, curtain gas = 20 L/min, ion spray voltage =  
665 4500 V, temperature = 400 °C. A typical LC-run consisted of 55 minutes, with the following  
666 solvent run sequence post injection: 0.3 ml/min 0% buffer B for 5 minutes, 0.5 ml/min 0%  
667 buffer B for 5 minutes, 0.5 ml/min linear gradient of buffer B from 0 – 100% over 25  
668 minutes, 0.5 ml/min of 100% buffer B for 10 minutes, and re-equilibration with 0.5 ml/min  
669 of 0% buffer B for 10 minutes. A detailed list of all the species targeted in this MRM study,  
670 describing the precursor parent ion mass and adduct, the product ion targeted can be  
671 found in Suppl. Table 2. All the endogenous lipid species were quantified by measuring  
672 the area under the curve in comparison to the respective internal standard, and then  
673 normalizing to the number of larval brains. All oxidized phospholipids detected were  
674 normalized to the corresponding unoxidized phospholipid internal standard. All the data  
675 is represented as mean  $\pm$  s. e. m. of 4 biological replicates per genotype.

676 mRNA isolation, cDNA preparation and qRT PCR: About 1  $\mu$ g of mRNA was isolated from  
677 12-18 third instar larval brains using Direct-zol™ RNA MicroPrep Kit (R2062) from Zymo  
678 Research. The cDNA reaction was carried out using High Capacity cDNA Reverse  
679 Transcriptase Kit (4368814) by Applied Biosystems. The qPCR reaction was carried out  
680 using KAPA SYBR FAST (KK4602) by Sigma using Replex Mastercycler by Eppendorf.  
681 The experiment was carried out in three biological replicates with technical triplicates.

682



## Acknowledgements

The S2R+ screen was carried out as a paid service at the NCBS:C-CAMP high throughput screening facility. At NCBS, we thank Dr. Satyajit Mayor for his support; MS Shahab Uddin, Lokavya Kurup and Vandana for technical assistance during the execution of the screen; Kausik Chakraborty, IGIB for advice on the analysis of the screen. We thank Bloomington Drosophila Stock Center (BDSC), Indiana, supported by NIH grant P40OD018537, for fly stocks; Drosophila Genome Research Centre (DGRC), Indiana supported by NIH grant 2P40OD010949 for vectors and clones; TRiP collection at Harvard Medical School (NIH/NIGMS R01-GM084947) for providing transgenic RNAi fly stocks. We thank IISER Microscopy/Confocal Facility and Dr. Nagaraj Balasubramaniam for access to the EVOS system. Shubham Singh and Shabnam Patil are thanked for technical assistance. This work is funded by a research grant from the Department of Biotechnology, Govt. of India (BT/PR8636/AGR/36/786/2013) and Department of Science and Technology, Science and Engineering Research Board (DST-SERB), Govt. of India (EMR/2014/000367) to GR, a DST-SERB Early Career Research Award in Life Sciences (ECR/2016/001261) to SSK, and a DST-FIST infrastructure development grant to the IISER Pune Biology Department. LP was a UG student at IISER and carried out the S2R+ screen at NCBS. KC and SD are/were graduate students supported by research fellowships from CSIR, Govt. of India. KC is an awardee of the DMM conference travel grant. We thank; Anuradha Ratnaparkhi for discussions and comments on the Manuscript, Richa Rikhy for helpful discussions.

## Author Contributions

GR conceived the project and designed the experiments, with input from KC, LP, SSK and SD. KC and LP performed all the experiments. BR wrote the MATLAB code to analyse the screen. SSK contributed by designing and overseeing experiments related to oxidation of proteins and lipids. GR, KC, LP, BR, SD and SSK analysed the data and wrote the Manuscript. The authors declare no conflict of interest.

## References

- Alpy, F., A. Rousseau, Y. Schwab, F. Legueux, I. Stoll *et al.*, 2013 STARD3 or STARD3NL and VAP form a novel molecular tether between late endosomes and the ER. *J Cell Sci* 126: 5500-5512.
- Anagnostou, G., M. T. Akbar, P. Paul, C. Angelinetta, T. J. Steiner *et al.*, 2010 Vesicle associated membrane protein B (VAPB) is decreased in ALS spinal cord. *Neurobiol Aging* 31: 969-985.
- Andersen, P. M., and A. Al-Chalabi, 2011 Clinical genetics of amyotrophic lateral sclerosis: what do we really know? *Nature Reviews Neurology* 7: 603-615.
- Barber, S. C., R. J. Mead and P. J. Shaw, 2006 Oxidative stress in ALS: a mechanism of neurodegeneration and a therapeutic target. *Biochim Biophys Acta* 1762: 1051-1067.
- Baron, Y., P. G. Pedrioli, K. Tyagi, C. Johnson, N. T. Wood *et al.*, 2014 VAPB/ALS8 interacts with FFAT-like proteins including the p97 cofactor FAF1 and the ASNA1 ATPase. *BMC Biol* 12: 39.
- Bhaskar, V., S. A. Valentine and A. J. Courey, 2000 A functional interaction between dorsal and components of the Smt3 conjugation machinery. *J Biol Chem* 275: 4033-4040.
- Castello, P. R., D. A. Drechsel and M. Patel, 2007 Mitochondria are a major source of paraquat-induced reactive oxygen species production in the brain. *J Biol Chem* 282: 14186-14193.
- Cavanaugh, J. E., J. D. Jaumotte, J. M. Lakoski and M. J. Zigmond, 2006 Neuroprotective role of ERK1/2 and ERK5 in a dopaminergic cell line under basal conditions and in response to oxidative stress. *J Neurosci Res* 84: 1367-1375.
- Chai, A., J. Withers, Y. H. Koh, K. Parry, H. Bao *et al.*, 2008 hVAPB, the causative gene of a heterogeneous group of motor neuron diseases in humans, is functionally interchangeable with its *Drosophila* homologue DVAP-33A at the neuromuscular junction. *Hum Mol Genet* 17: 266-280.
- Chen, G. C., J. Y. Lee, H. W. Tang, J. Debnath, S. M. Thomas *et al.*, 2008 Genetic interactions between *Drosophila melanogaster* Atg1 and paxillin reveal a role for paxillin in autophagosome formation. *Autophagy* 4: 37-45.
- Cleveland, D. W., and J. D. Rothstein, 2001 From Charcot to Lou Gehrig: deciphering selective motor neuron death in ALS. *Nature Reviews Neuroscience* 2: 806-819.
- Cluskey, S., and D. B. Ramsden, 2001 Mechanisms of neurodegeneration in amyotrophic lateral sclerosis. *Mol Pathol* 54: 386-392.
- Cocheme, H. M., C. Quin, S. J. McQuaker, F. Cabreiro, A. Logan *et al.*, 2011 Measurement of H<sub>2</sub>O<sub>2</sub> within living *Drosophila* during aging using a ratiometric mass spectrometry probe targeted to the mitochondrial matrix. *Cell Metab* 13: 340-350.
- De Vos, K. J., G. M. Morotz, R. Stoica, E. L. Tudor, K. F. Lau *et al.*, 2012 VAPB interacts with the mitochondrial protein PTPIP51 to regulate calcium homeostasis. *Hum Mol Genet* 21: 1299-1311.
- Deivasigamani, S., H. K. Verma, R. Ueda, A. Ratnaparkhi and G. S. Ratnaparkhi, 2014 A genetic screen identifies Tor as an interactor of VAPB in a *Drosophila* model of amyotrophic lateral sclerosis. *Biology Open* 3: 1127-1138.
- Deng, H. X., A. Hentati, J. A. Tainer, Z. Iqbal, A. Cayabyab *et al.*, 1993 Amyotrophic lateral sclerosis and structural defects in Cu,Zn superoxide dismutase. *Science* 261: 1047-1051.

- Dey, G., G. D. Gupta, B. Ramalingam, M. Sathe, S. Mayor *et al.*, 2014 Exploiting Cell-To-Cell Variability To Detect Cellular Perturbations. *PLoS ONE* 9: e90540.
- Drechsel, D. A., and M. Patel, 2008 Role of reactive oxygen species in the neurotoxicity of environmental agents implicated in Parkinson's disease. *Free Radic Biol Med* 44: 1873-1886.
- Echeverri, C. J., and N. Perrimon, 2006 High-throughput RNAi screening in cultured cells: a user's guide. *Nat Rev Genet* 7: 373-384.
- Genevini, P., G. Papiani, A. Ruggiano, L. Cantoni, F. Navone *et al.*, 2014 Amyotrophic lateral sclerosis-linked mutant VAPB inclusions do not interfere with protein degradation pathways or intracellular transport in a cultured cell model. *PLoS One* 9: e113416.
- Gkogkas, C., S. Middleton, A. M. Kremer, C. Wardrope, M. Hannah *et al.*, 2008 VAPB interacts with and modulates the activity of ATF6. *Human Molecular Genetics* 17: 1517-1526.
- Gomez-Suaga, P., S. Paillusson and C. C. J. Miller, 2017a ER-mitochondria signaling regulates autophagy. *Autophagy* 13: 1250-1251.
- Gomez-Suaga, P., S. Paillusson, R. Stoica, W. Noble, D. P. Hanger *et al.*, 2017b The ER-Mitochondria Tethering Complex VAPB-PTPIP51 Regulates Autophagy. *Curr Biol* 27: 371-385.
- Han, S. M., H. Tsuda, Y. Yang, J. Vibbert, P. Cottee *et al.*, 2012 Secreted VAPB/ALS8 major sperm protein domains modulate mitochondrial localization and morphology via growth cone guidance receptors. *Dev Cell* 22: 348-362.
- Heitman, J., N. R. Movva and M. N. Hall, 1991 Targets for cell cycle arrest by the immunosuppressant rapamycin in yeast. *Science* 253: 905-909.
- Huttlin, E. L., L. Ting, R. J. Bruckner, F. Gebreab, M. P. Gygi *et al.*, 2015 The BioPlex Network: A Systematic Exploration of the Human Interactome. *Cell* 162: 425-440.
- Kamat, S. S., K. Camara, W. H. Parsons, D. H. Chen, M. M. Dix *et al.*, 2015 Immunomodulatory lysophosphatidylserines are regulated by ABHD16A and ABHD12 interplay. *Nat Chem Biol* 11: 164-171.
- Kanekura, K., I. Nishimoto, S. Aiso and M. Matsuoka, 2006 Characterization of amyotrophic lateral sclerosis-linked P56S mutation of vesicle-associated membrane protein-associated protein B (VAPB/ALS8). *J Biol Chem* 281: 30223-30233.
- Kim, J. Y., A. Jang, R. Reddy, W. H. Yoon and J. L. Jankowsky, 2016 Neuronal overexpression of human VAPB slows motor impairment and neuromuscular denervation in a mouse model of ALS. *Hum Mol Genet* 25: 4661-4673.
- Kory, N., S. Grond, S. S. Kamat, Z. Li, N. Kraemer *et al.*, 2017 Mice lacking lipid droplet-associated hydrolase, a gene linked to human prostate cancer, have normal cholesterol ester metabolism. *J Lipid Res* 58: 226-235.
- Kuijpers, M., V. van Dis, E. D. Haasdijk, M. Harterink, K. Vocking *et al.*, 2013 Amyotrophic lateral sclerosis (ALS)-associated VAPB-P56S inclusions represent an ER quality control compartment. *Acta Neuropathol Commun* 1: 24.
- Larroquette, F., L. Seto, P. L. Gaub, B. Kamal, D. Wallis *et al.*, 2015 Vapb/Amyotrophic lateral sclerosis 8 knock-in mice display slowly progressive motor behavior defects accompanying ER stress and autophagic response. *Hum Mol Genet* 24: 6515-6529.
- Lev, S., D. Ben Halevy, D. Peretti and N. Dahan, 2008 The VAP protein family: from cellular functions to motor neuron disease. *Trends Cell Biol* 18: 282-290.

- Linkert, M., C. T. Rueden, C. Allan, J. M. Burel, W. Moore *et al.*, 2010 Metadata matters: access to image data in the real world. *J Cell Biol* 189: 777-782.
- Loewen, C. J., A. Roy and T. P. Levine, 2003 A conserved ER targeting motif in three families of lipid binding proteins and in Opi1p binds VAP. *EMBO J* 22: 2025-2035.
- Mandrioli, J., R. D'Amico, E. Zucchi, A. Gessani, N. Fini *et al.*, 2018 Rapamycin treatment for amyotrophic lateral sclerosis: Protocol for a phase II randomized, double-blind, placebo-controlled, multicenter, clinical trial (RAP-ALS trial). *Medicine (Baltimore)* 97: e11119.
- Marygold, S. J., P. C. Leyland, R. L. Seal, J. L. Goodman, J. Thurmond *et al.*, 2013 FlyBase: improvements to the bibliography. *Nucleic Acids Res* 41: D751-757.
- Metz, J., I. G. Castro and M. Schrader, 2017 Peroxisome Motility Measurement and Quantification Assay. *Bio Protoc* 7.
- Milton, V. J., H. E. Jarrett, K. Gowers, S. Chalak, L. Briggs *et al.*, 2011 Oxidative stress induces overgrowth of the Drosophila neuromuscular junction. *Proc Natl Acad Sci U S A* 108: 17521-17526.
- Mitne-Neto, M., C. R. Ramos, D. C. Pimenta, J. S. Luz, A. L. Nishimura *et al.*, 2007 A mutation in human VAP-B--MSP domain, present in ALS patients, affects the interaction with other cellular proteins. *Protein Expr Purif* 55: 139-146.
- Moujalled, D., A. Grubman, K. Acevedo, S. Yang, Y. D. Ke *et al.*, 2017 TDP-43 mutations causing amyotrophic lateral sclerosis are associated with altered expression of RNA-binding protein hnRNP K and affect the Nrf2 antioxidant pathway. *Hum Mol Genet* 26: 1732-1746.
- Moustaqim-Barrette, A., Y. Q. Lin, S. Pradhan, G. G. Neely, H. J. Bellen *et al.*, 2014 The amyotrophic lateral sclerosis 8 protein, VAP, is required for ER protein quality control. *Hum Mol Genet* 23: 1975-1989.
- Mulligan, V. K., and A. Chakrabarty, 2013 Protein misfolding in the late-onset neurodegenerative diseases: Common themes and the unique case of amyotrophic lateral sclerosis. *Proteins* 81: 1285-1303.
- Murphy, S. E., and T. P. Levine, 2016 VAP, a Versatile Access Point for the Endoplasmic Reticulum: Review and analysis of FFAT-like motifs in the VAPome. *Biochim Biophys Acta* 1861: 952-961.
- Nishimura, A. L., M. Mitne-Neto, H. C. A. Silva, A. Richieri-Costa, S. Middleton *et al.*, 2004 A Mutation in the Vesicle-Trafficking Protein VAPB Causes Late-Onset Spinal Muscular Atrophy and Amyotrophic Lateral Sclerosis. *The American Journal of Human Genetics* 75: 822-831.
- Noda, T., and Y. Ohsumi, 1998 Tor, a phosphatidylinositol kinase homologue, controls autophagy in yeast. *J Biol Chem* 273: 3963-3966.
- Ogrodnik, M., H. Salmonowicz, R. Brown, J. Turkowska, W. Sredniawa *et al.*, 2014 Dynamic JUNQ inclusion bodies are asymmetrically inherited in mammalian cell lines through the asymmetric partitioning of vimentin. *Proc Natl Acad Sci U S A* 111: 8049-8054.
- Paillusson, S., P. Gomez-Suaga, R. Stoica, D. Little, P. Gissen *et al.*, 2017 alpha-Synuclein binds to the ER-mitochondria tethering protein VAPB to disrupt Ca(2+) homeostasis and mitochondrial ATP production. *Acta Neuropathol* 134: 129-149.

- Papiani, G., A. Ruggiano, M. Fossati, A. Raimondi, G. Bertoni *et al.*, 2012 Restructured endoplasmic reticulum generated by mutant amyotrophic lateral sclerosis-linked VAPB is cleared by the proteasome. *J Cell Sci* 125: 3601-3611.
- Pennetta, G., P. R. Hiesinger, R. Fabian-Fine, I. A. Meinertzhagen and H. J. Bellen, 2002 *Drosophila* VAP-33A directs bouton formation at neuromuscular junctions in a dosage-dependent manner. *Neuron* 35: 291-306.
- Perluigi, M., F. Di Domenico and D. A. Butterfield, 2015 mTOR signaling in aging and neurodegeneration: At the crossroad between metabolism dysfunction and impairment of autophagy. *Neurobiol Dis* 84: 39-49.
- Prause, J., A. Goswami, I. Katona, A. Roos, M. Schnizler *et al.*, 2013 Altered localization, abnormal modification and loss of function of Sigma receptor-1 in amyotrophic lateral sclerosis. *Hum Mol Genet* 22: 1581-1600.
- Qiu, L., T. Qiao, M. Beers, W. Tan, H. Wang *et al.*, 2013 Widespread aggregation of mutant VAPB associated with ALS does not cause motor neuron degeneration or modulate mutant SOD1 aggregation and toxicity in mice. *Mol Neurodegener* 8: 1.
- Ratnaparkhi, A., G. M. Lawless, F. E. Schweizer, P. Golshani and G. R. Jackson, 2008 A *Drosophila* Model of ALS: Human ALS-Associated Mutation in VAP33A Suggests a Dominant Negative Mechanism. *PLoS ONE* 3: e2334.
- Ravikumar, B., C. Vacher, Z. Berger, J. E. Davies, S. Luo *et al.*, 2004 Inhibition of mTOR induces autophagy and reduces toxicity of polyglutamine expansions in fly and mouse models of Huntington disease. *Nat Genet* 36: 585-595.
- Rogers, S. L., and G. C. Rogers, 2008 Culture of *Drosophila* S2 cells and their use for RNAi-mediated loss-of-function studies and immunofluorescence microscopy. *Nat Protoc* 3: 606-611.
- Rosen, D. R., T. Siddique, D. Patterson, D. A. Figlewicz, P. Sapp *et al.*, 1993 Mutations in Cu/Zn superoxide dismutase gene are associated with familial amyotrophic lateral sclerosis. *Nature* 362: 59-62.
- Rousseau, A., and A. Bertolotti, 2016 An evolutionarily conserved pathway controls proteasome homeostasis. *Nature* 536: 184-189.
- Sacson, R. A., R. K. Bunton-Stasyshyn, E. M. Fisher and P. Fratta, 2013 Is SOD1 loss of function involved in amyotrophic lateral sclerosis? *Brain* 136: 2342-2358.
- Sanhueza, M., A. Chai, C. Smith, B. A. McCray, T. I. Simpson *et al.*, 2015 Network Analyses Reveal Novel Aspects of ALS Pathogenesis. *PLoS Genet* 11: e1005107.
- Spilman, P., N. Podlutskaya, M. J. Hart, J. Debnath, O. Gorostiza *et al.*, 2010 Inhibition of mTOR by rapamycin abolishes cognitive deficits and reduces amyloid-beta levels in a mouse model of Alzheimer's disease. *PLoS One* 5: e9979.
- Stoica, R., K. J. De Vos, S. Paillusson, S. Mueller, R. M. Sancho *et al.*, 2014 ER-mitochondria associations are regulated by the VAPB-PTPIP51 interaction and are disrupted by ALS/FTD-associated TDP-43. *Nat Commun* 5: 3996.
- Stoica, R., S. Paillusson, P. Gomez-Suaga, J. C. Mitchell, D. H. Lau *et al.*, 2016 ALS/FTD-associated FUS activates GSK-3 $\beta$  to disrupt the VAPB-PTPIP51 interaction and ER-mitochondria associations. *EMBO Rep* 17: 1326-1342.

- Su, C., F. Sun, R. L. Cunningham, N. Rybalchenko and M. Singh, 2014 ERK5/KLF4 signaling as a common mediator of the neuroprotective effects of both nerve growth factor and hydrogen peroxide preconditioning. *Age (Dordr)* 36: 9685.
- Sun, X., T. Komatsu, J. Lim, M. Laslo, J. Yolitz *et al.*, 2012 Nutrient-dependent requirement for SOD1 in lifespan extension by protein restriction in *Drosophila melanogaster*. *Aging Cell* 11: 783-793.
- Tarasiuk, J., A. Kułakowska, W. Drozdowski, J. Kornhuber and P. Lewczuk, 2012 CSF markers in amyotrophic lateral sclerosis. *Journal of Neural Transmission* 119: 747-757.
- Taylor, J. P., R. H. Brown, Jr. and D. W. Cleveland, 2016 Decoding ALS: from genes to mechanism. *Nature* 539: 197-206.
- Teuling, E., S. Ahmed, E. Haasdijk, J. Demmers, M. O. Steinmetz *et al.*, 2007 Motor Neuron Disease-Associated Mutant Vesicle-Associated Membrane Protein-Associated Protein (VAP) B Recruits Wild-Type VAPs into Endoplasmic Reticulum-Derived Tubular Aggregates. *Journal of Neuroscience* 27: 9801-9815.
- Tsang, C. K., M. Chen, X. Cheng, Y. Qi, Y. Chen *et al.*, 2018 SOD1 Phosphorylation by mTORC1 Couples Nutrient Sensing and Redox Regulation. *Mol Cell* 70: 502-515 e508.
- Tsuda, H., S. M. Han, Y. Yang, C. Tong, Y. Q. Lin *et al.*, 2008 The Amyotrophic Lateral Sclerosis 8 Protein VAPB Is Cleaved, Secreted, and Acts as a Ligand for Eph Receptors. *Cell* 133: 963-977.
- Tudor, E. L., C. M. Galtrey, M. S. Perkinson, K. F. Lau, K. J. De Vos *et al.*, 2010 Amyotrophic lateral sclerosis mutant vesicle-associated membrane protein-associated protein-B transgenic mice develop TAR-DNA-binding protein-43 pathology. *Neuroscience* 167: 774-785.
- Turner, B. J., D. Baumer, N. J. Parkinson, J. Scaber, O. Ansorge *et al.*, 2008 TDP-43 expression in mouse models of amyotrophic lateral sclerosis and spinal muscular atrophy. *BMC Neurosci* 9: 104.
- Turner, M. R., O. Hardiman, M. Benatar, B. R. Brooks, A. Chio *et al.*, 2013 Controversies and priorities in amyotrophic lateral sclerosis. *The Lancet Neurology* 12: 310-322.
- Tyurina, Y. Y., A. A. Shvedova, K. Kawai, V. A. Tyurin, C. Kommineni *et al.*, 2000 Phospholipid signaling in apoptosis: peroxidation and externalization of phosphatidylserine. *Toxicology* 148: 93-101.
- van Blitterswijk, M., M. A. van Es, E. A. Hennekam, D. Dooijes, W. van Rheenen *et al.*, 2012 Evidence for an oligogenic basis of amyotrophic lateral sclerosis. *Hum Mol Genet* 21: 3776-3784.
- Walker, A. K., and J. D. Atkin, 2011 Stress signaling from the endoplasmic reticulum: A central player in the pathogenesis of amyotrophic lateral sclerosis. *IUBMB Life*: n/a-n/a.
- Wroe, R., A. Wai-Ling Butler, P. M. Andersen, J. F. Powell and A. Al-Chalabi, 2008 ALSOD: the Amyotrophic Lateral Sclerosis Online Database. *Amyotroph Lateral Scler* 9: 249-250.
- Yadav, S., R. Thakur, P. Georgiev, S. Deivasigamani, H. Krishnan *et al.*, 2018 RDGBalpha localization and function at membrane contact sites is regulated by FFAT-VAP interactions. *J Cell Sci* 131.
- Zhan, L., Q. Xie and R. S. Tibbetts, 2015 Opposing roles of p38 and JNK in a *Drosophila* model of TDP-43 proteinopathy reveal oxidative stress and innate immunity as pathogenic components of neurodegeneration. *Hum Mol Genet* 24: 757-772.

- Zhang, S., R. Binari, R. Zhou and N. Perrimon, 2010 A Genomewide RNA Interference Screen for Modifiers of Aggregates Formation by Mutant Huntingtin in *Drosophila*. *Genetics* 184: 1165-1179.
- Zhao, J., B. Zhai, S. P. Gygi and A. L. Goldberg, 2015 mTOR inhibition activates overall protein degradation by the ubiquitin proteasome system as well as by autophagy. *Proc Natl Acad Sci U S A* 112: 15790-15797.
- Zhao, Y. G., N. Liu, G. Miao, Y. Chen, H. Zhao *et al.*, 2018 The ER Contact Proteins VAPA/B Interact with Multiple Autophagy Proteins to Modulate Autophagosome Biogenesis. *Curr Biol*.

1000 **Supplementary Material**

1001 [Suppl. Figures along with their legends are part of the Main Manuscript. Suppl. Tables](#)  
1002 [\(described below\) have been uploaded formally as 'Suppl. Files'.](#)

1003

1004 **Table 1** (Suppl. Table1.xls)

1005 **A.** List of 900 genes utilized for the screen. List is sorted alphabetically based on gene  
1006 symbol.

1007 **B.** 900 genes, utilized for the screen, classified and listed into 10 categories associated  
1008 with ALS or VAP or proteostasis.

1009 **C.** List of 150 modifiers of VAP(P58S) aggregation, based on average cell intensity, along  
1010 with their human orthologs.

1011 **D.** List of 85 modifiers of VAP(P58S) aggregation, based on total cell intensity, along with  
1012 their human orthologs.

1013

1014 **Table 2** (Suppl. Table2.xls)

1015 **A.** Details of the MRM transitions for the different phospholipids measured

1016 **B.** LC-MS quantitation of the different phospholipids for different genotypes and paraquat  
1017 treatment.

1018 **C.** LC-MS quantitation of the different phospholipids for knockdown of *TOR*.



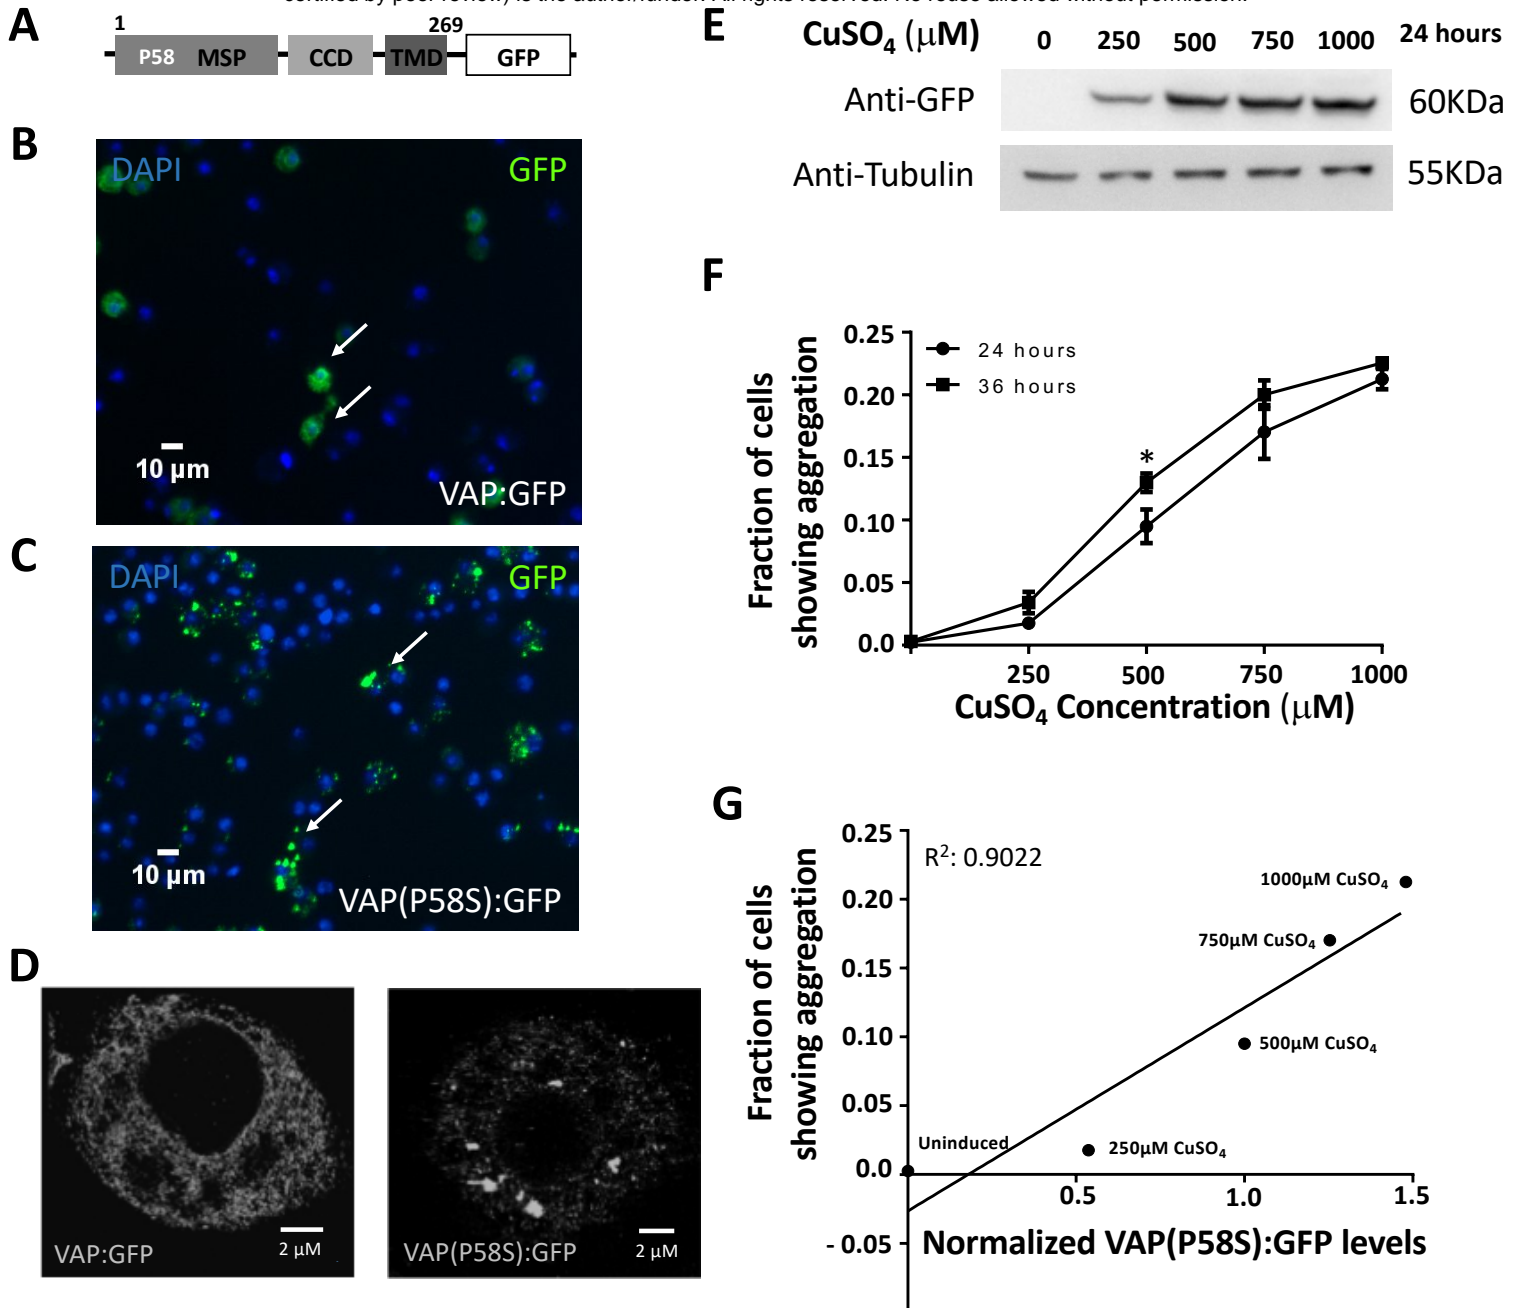

**Figure 1: A *Drosophila* cell culture model to study VAP(P58S) aggregation**

**A.** VAP:GFP and VAP(P58S):GFP when expressed in S2R+ cells allow efficient visualization of VAP protein in the cell by epifluorescence.

**B, C.** Stable cell lines: expressing VAP(P58S):GFP, under an inducible metallothionein promoter, results in aggregation (C), unlike VAP:GFP wild-type (B). GFP is visualized by epifluorescence and chromatin by DAPI, post-fixation.

**D.** A super resolution image, using Ground State Depletion microscopy, showing GFP inclusions forming in cells expressing VAP(P58S):GFP but not in VAP:GFP.

**E.** VAP(P58S):GFP protein levels in cells increase with increasing CuSO<sub>4</sub> concentration at 24 hours post induction.

**F.** Increase in fraction of cells showing GFP positive inclusions increases with CuSO<sub>4</sub> concentration. At 500 μM CuSO<sub>4</sub>, inclusions significantly increase between 24 hours and 36 hours. Student's t-test (P-value: \*<0.01)

**G.** A linear correlation between fraction of cells showing aggregation, measured using microscopy plotted against relative VAP(P58S):GFP protein levels, as quantified by western blotting, at 24 hours post induction.

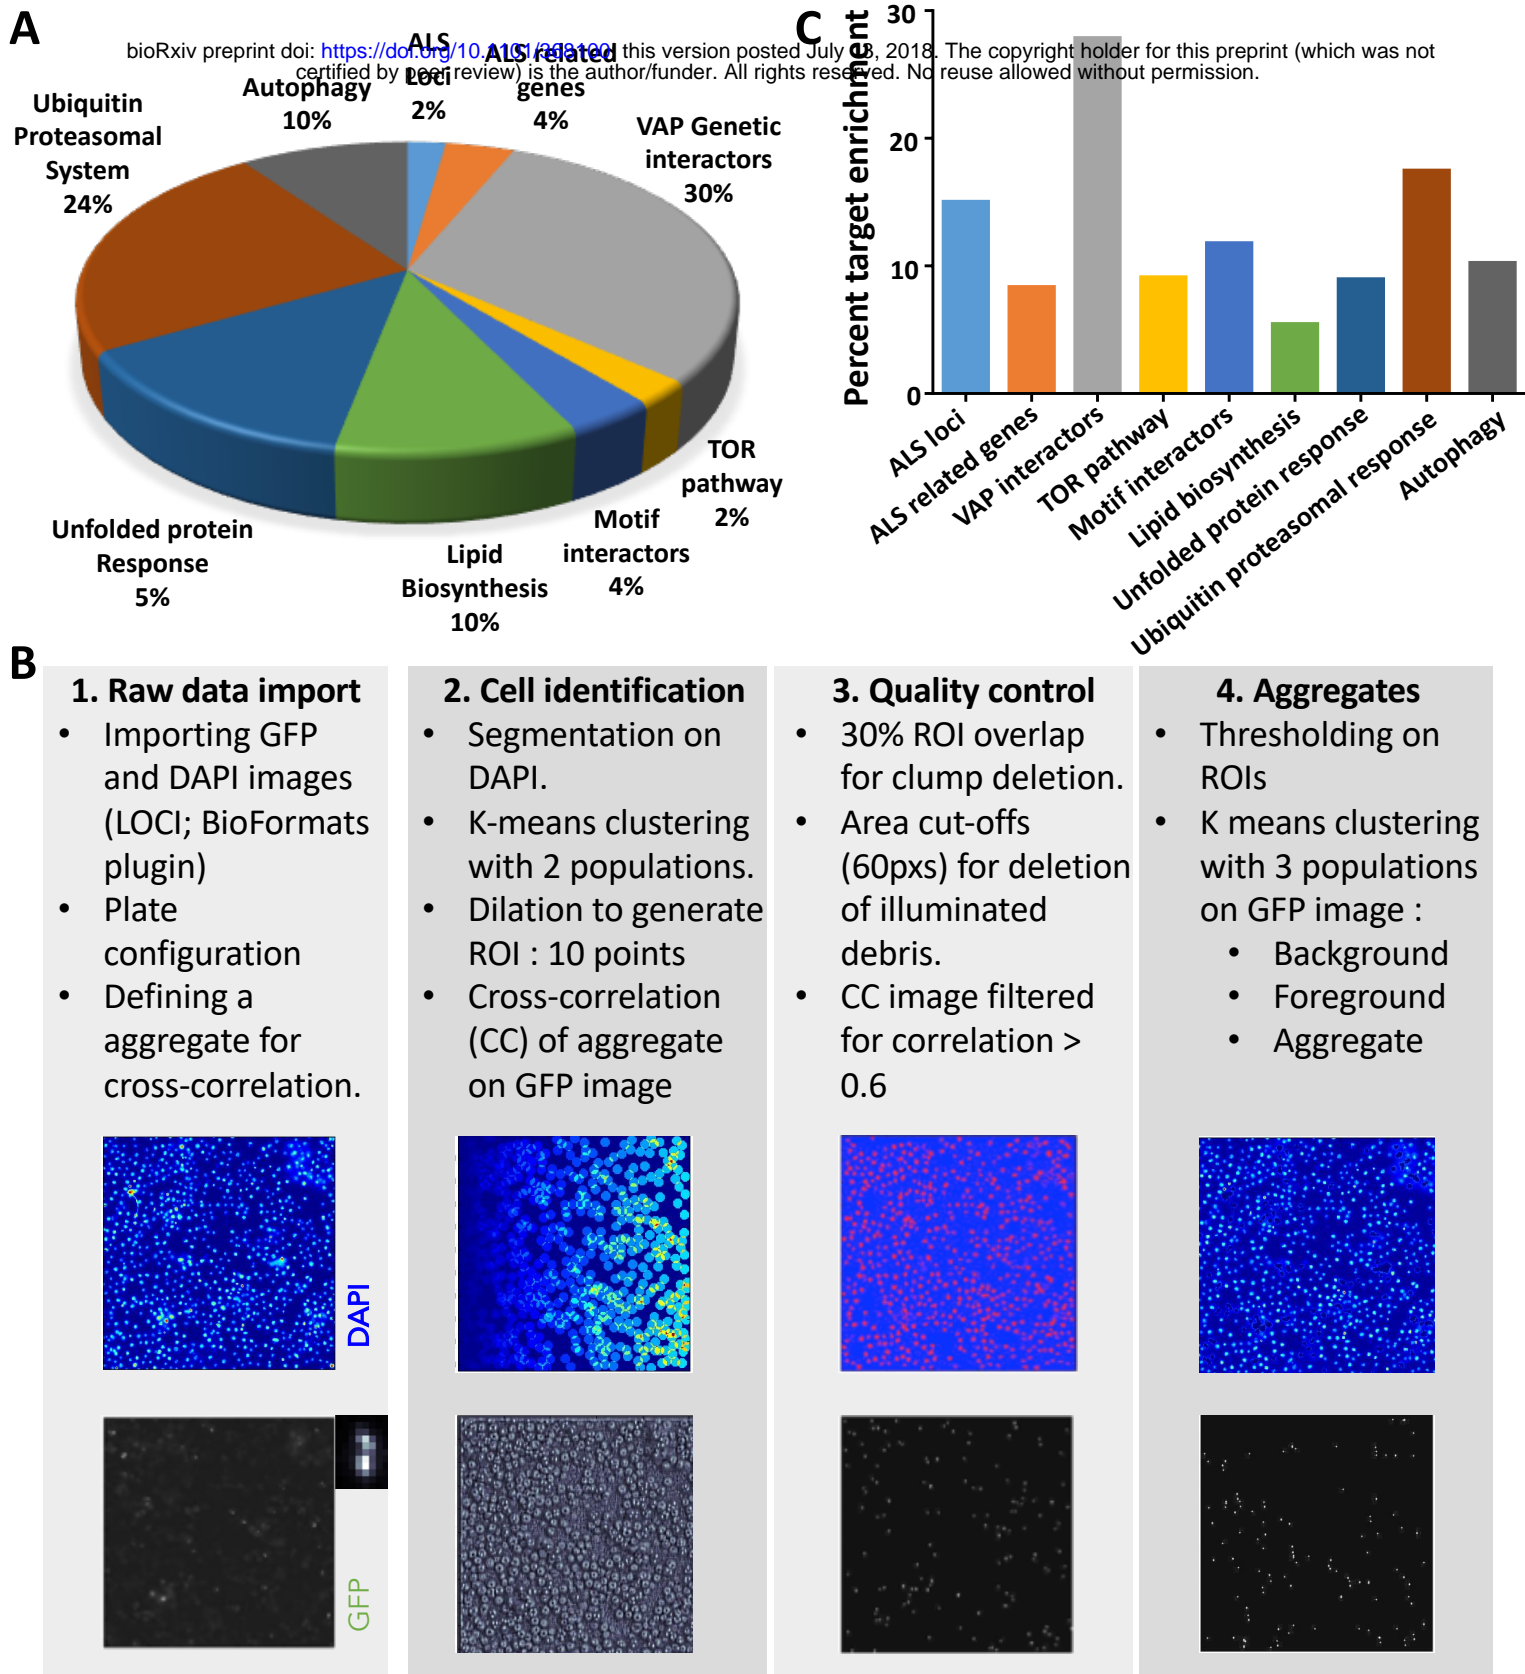

**Figure 2: A targeted dsRNA screen in S2R+ cells to discover modifiers of VAP(P58S):GFP aggregation.**

**A:** dsRNA for 900 genes (Suppl. Table 1A) were chosen for knockdown. GO representation indicates the categories of genes chosen and fraction (%) for each category. Genes were categorized as described in text (*Supplementary table 1A, 1B*).

**B:** Workflow of the steps executed for image analysis using an automated MATLAB script (Dey *et al*, 2014). Steps detailed in Material and Methods.

**C:** The end result of the screen is a list of 150 genes identified based on average cell intensity, which have been found to modify aggregation of VAP(P58S):GFP. Graph indicates the percent fold enrichment of targets within each gene category. Genes are listed in *Supplementary table 1C*.

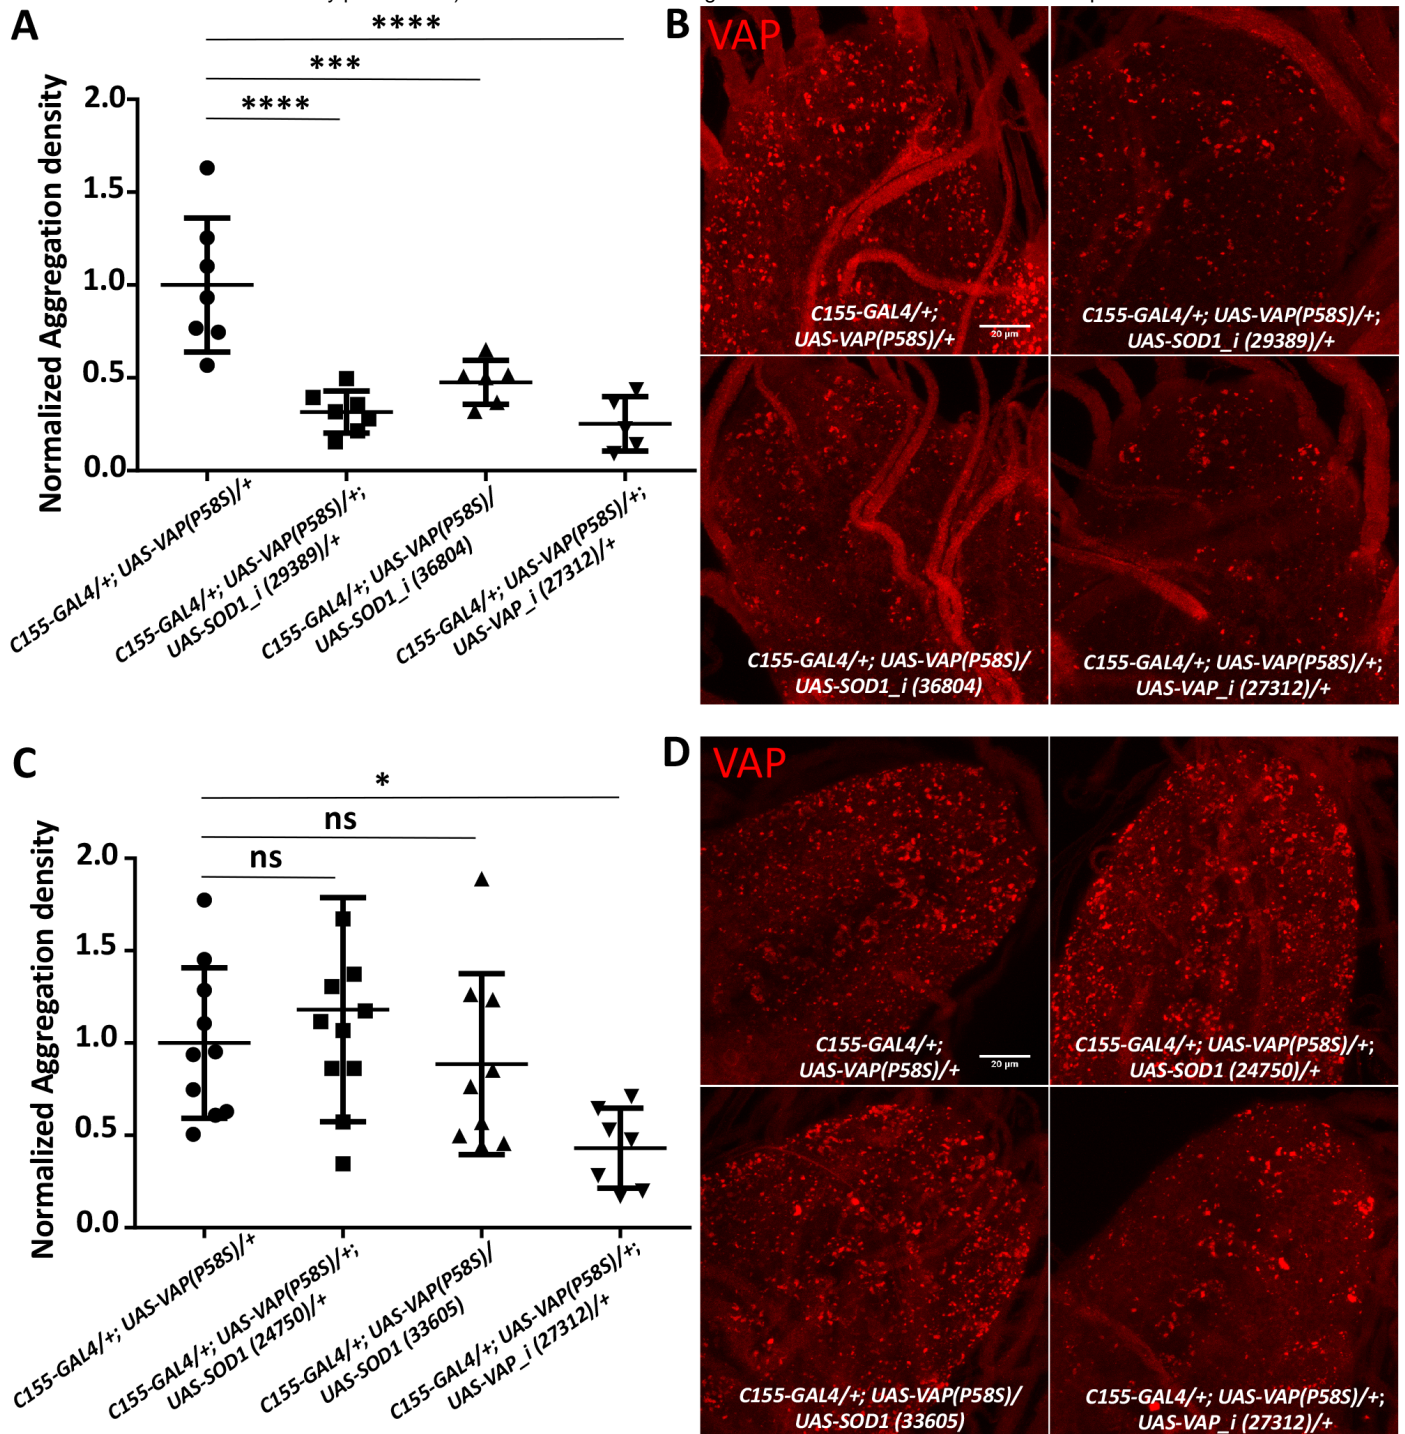

**Figure 3: SOD1 loss-of-function reduces VAP(P58S) aggregation in larval brains**

**A:** *SOD1* knockdown in the nervous system decreases aggregation density in the ventral nerve cord. VAP knockdown also reduces aggregation due to reduction in VAP protein expression. The ‘\_i’ appended to the gene name indicates an RNAi line. ANOVA (P value: \*\*\*\* < 0.0001). Numbers in brackets indicate BDSC stock numbers.

**B:** Representative images of the ventral nerve cord showing aggregation of VAP(P58S) with *SOD1* knockdown (29389 and 36804) and with VAP knockdown (27312).

**C:** *SOD1* overexpression does not affect aggregation density in the ventral nerve cord. ANOVA (P value: \*, 0.0208)

**D:** Representative images of the ventral nerve cord showing aggregation of VAP(P58S) with *SOD1* overexpression (24750 and 33605) and with VAP knockdown (27312).

All images were taken at the same magnification. Fisher’s LSD multiple comparison (P-values, \* < 0.05, \*\* < 0.01, \*\*\* < 0.001).

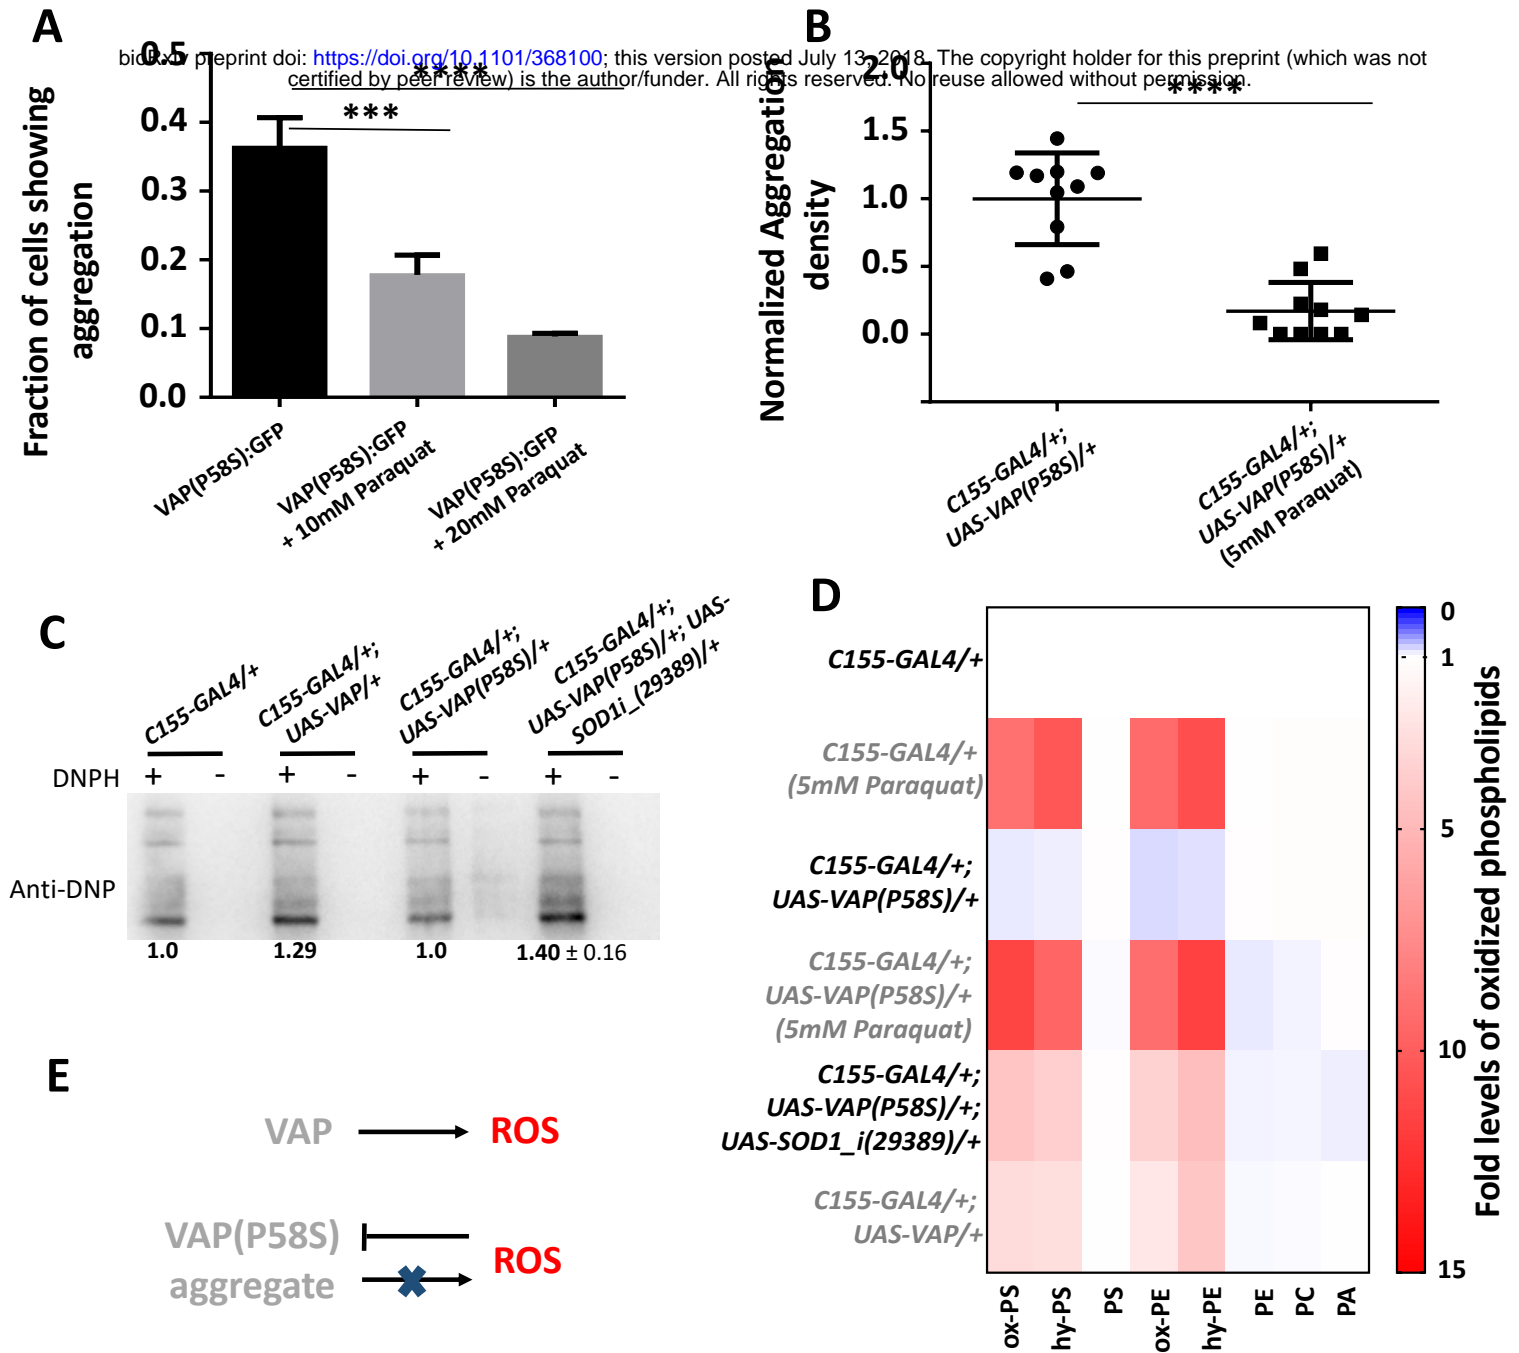

**Figure 4: Increase in ROS leads to decrease in VAP(P58S) aggregation levels.**

**A:** 4 hour Paraquat treatment prior to inducing VAP(P58S):GFP in stable S2R<sup>+</sup> cell line, reduces the fraction of cells showing aggregation observed 24 hours post-induction. ANOVA (P-value: \*\*\*\*<0.0001) Fisher's LSD multiple comparison test (P-values, \*\*\*<0.001, \*\*\*\*<0.0001).

**B:** Paraquat feeding decreases aggregation density in the ventral nerve cord of third instar larval brains in *C155-GAL4/+; UAS-VAP(P58S)/+* flies. Student's t-test (P-value: \*\*\*\*<0.0001).

**C:** Oxyblot showing increased levels of oxidized proteins in larval brains (N=14) upon SOD knockdown, or VAP overexpression. Values below the gel indicate fold intensity of the strongest band, when compared to control (*C155-GAL4/+*). *Suppl. Fig. 4C* shows a calibration for the Oxyblot system, values measured after feeding increasing amounts of Paraquat to larvae.

**D:** Heat map depicting change in levels of oxidized phospholipids normalized to *C155-GAL4/+*, quantified using MS in response to ROS generated in third instar larval brains (N=4) for the listed genotypes. SOD knockdown as well as VAP overexpression appears to increase cellular ROS levels. Statistical tests are described in *Suppl. table 2*.

**E:** Model depicting the effect of overexpression of wildtype and mutant VAP on ROS.

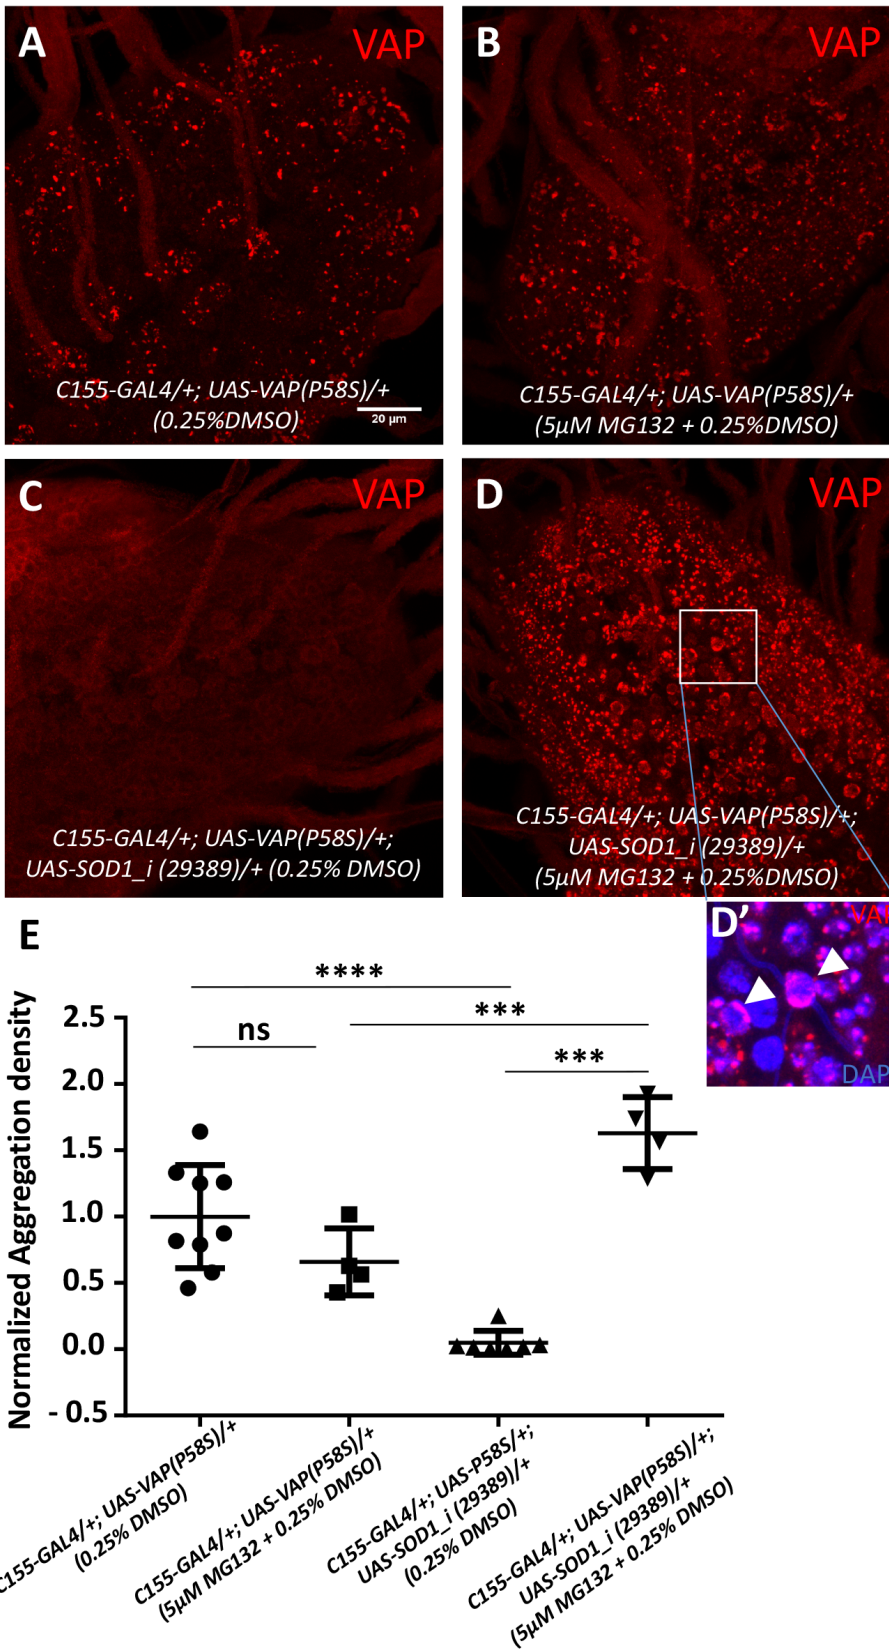

**Figure 5: ROS activates proteasomal machinery:**

**A,B:** MG132 feeding of *C155-GAL4/+; UAS-VAP(P58S)/+*, to inhibit proteasomal machinery, does not accumulate aggregation.

**C,D,D':** MG132 feeding of *C155-GAL4/+; UAS-VAP(P58S)/+; UAS-SOD1\_i (29389)/+*, accumulate aggregation. The aggregates, in presence of ROS and MG132, seem to be smaller, scattered and localized around the nuclear membrane (arrowheads) as depicted in inset (**D'**).

**E:** Plot showing significant decrease in aggregation density in the ventral nerve cord in *C155-GAL4/+; UAS-VAP(P58S)/+; UAS-SOD1\_i (29389)/+* as compared to *C155-GAL4/+; UAS-VAP(P58S)/+* control. This decrease is rescued by feeding 5 $\mu$ M MG132 and is significantly higher than the *C155-GAL4/+; UAS-VAP(P58S)/+* control, both unfed and fed with MG132. All images were taken at the same magnification. ANOVA (P-value: \*\*\*\*<0.0001) Fisher's LSD multiple comparison test (P-values, \*\*\*<0.001, \*\*\*\*<0.0001)

**F:** Model depicting the role of SOD1-regulated ROS in activating proteasomal degradation of VAP(P58S) protein/aggregates.

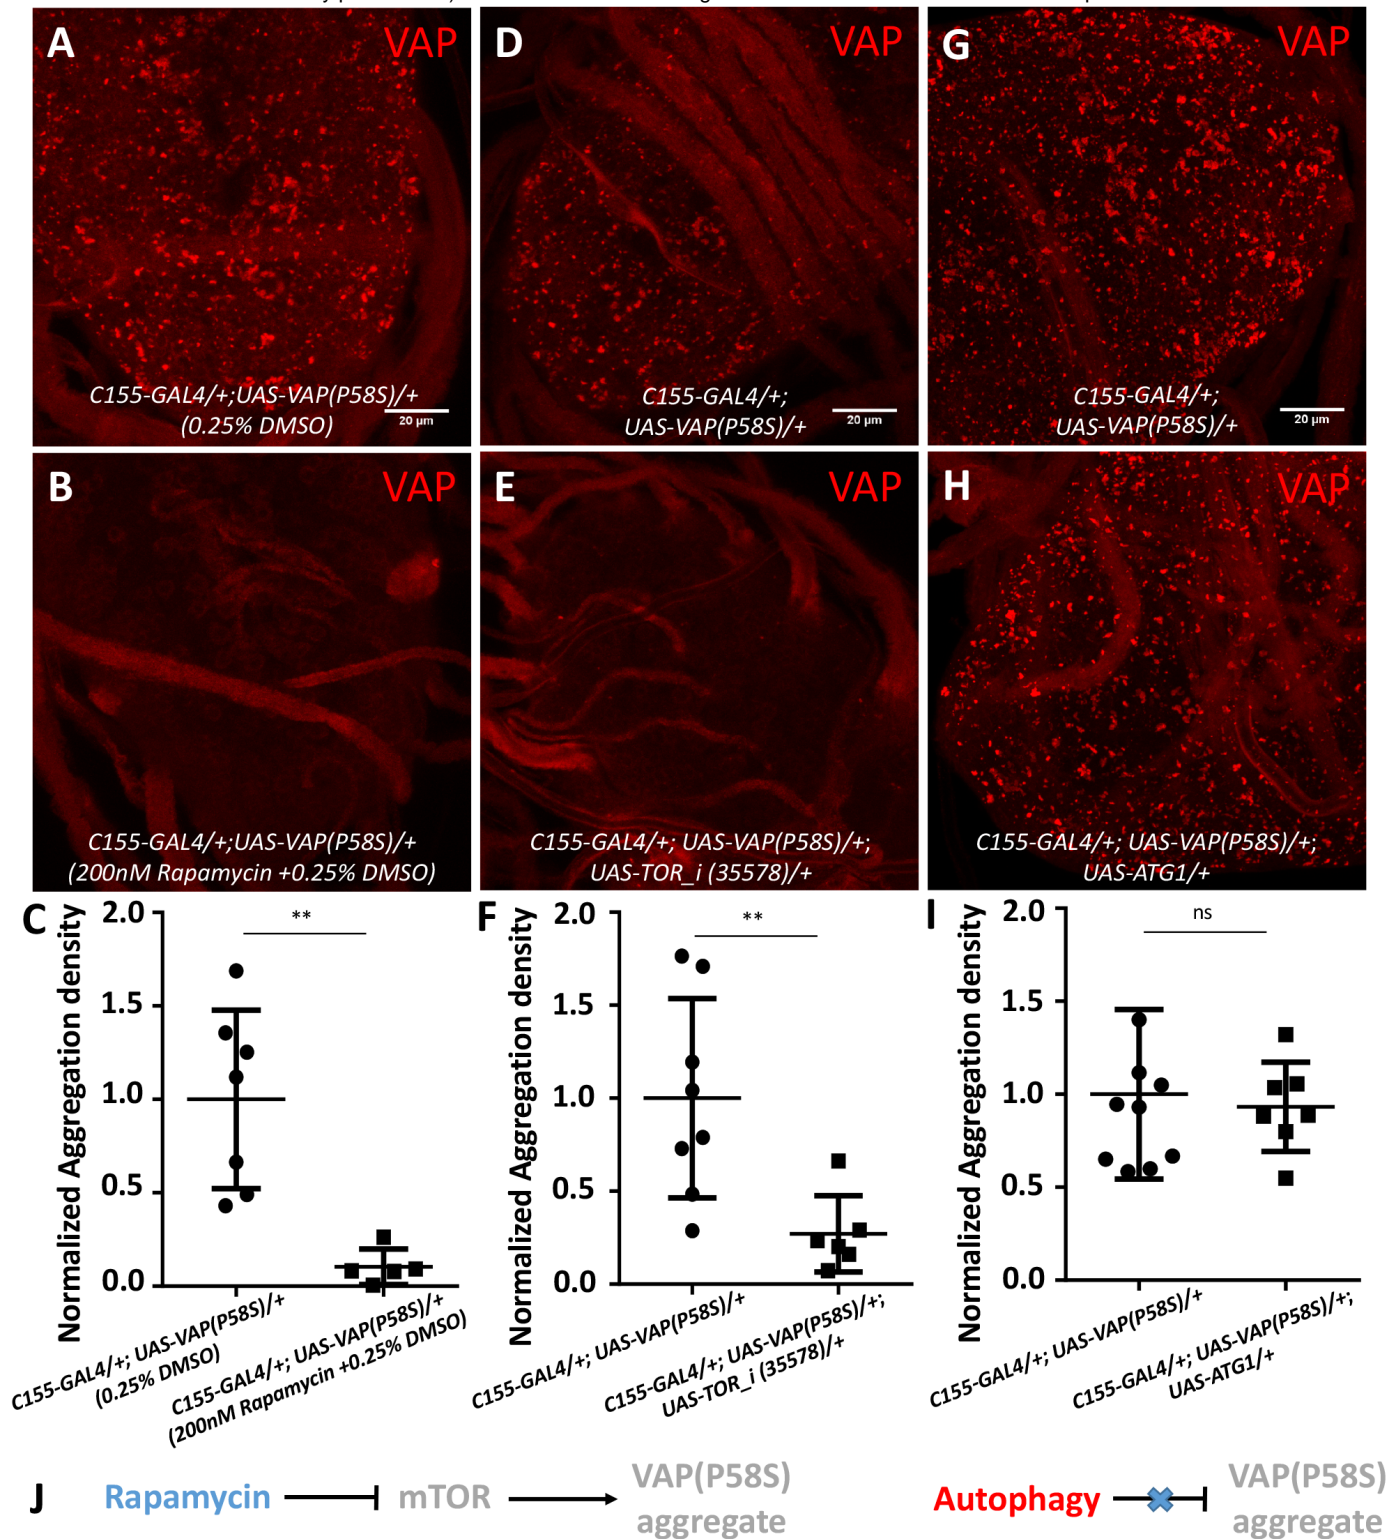

**Figure 6: mTOR inhibition reduces VAP(P58S) aggregation independent of autophagy.**

**A-C:** Rapamycin feeding decreases aggregation density in the ventral nerve cord of third instar larval brains in *C155-GAL4/+; UAS-VAP(P58S)/+* flies.

**D-F:** Neuronal TOR knockdown decreases aggregation density in the ventral nerve cord. The ‘*i*’ appended to the gene name indicates an RNAi line.

**G-I:** Neuronal overexpression of Atg1 did not affect the aggregation density in the ventral nerve cord.

All images were taken at the same magnification. Student’s t-test (P-value, \*\*<0.01)

**J:** Model depicting mTOR-regulated clearance of aggregation, independent of autophagy.

A

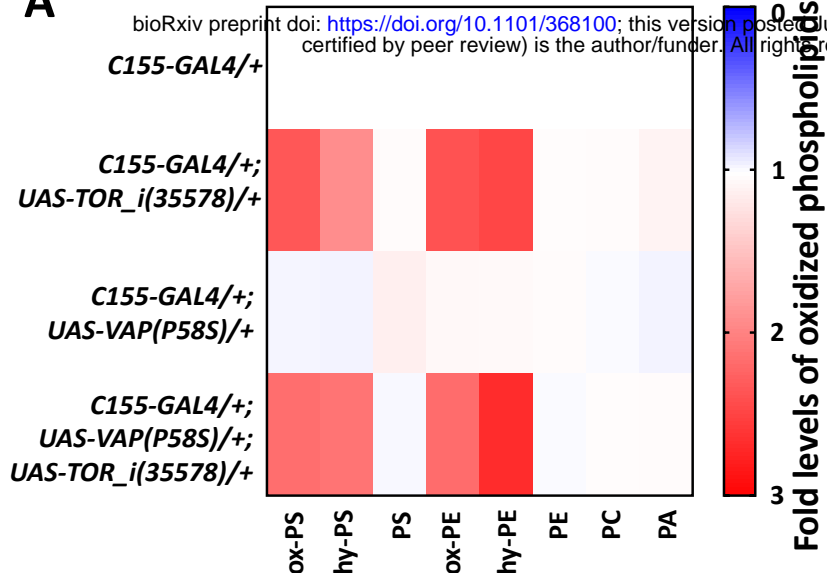

B

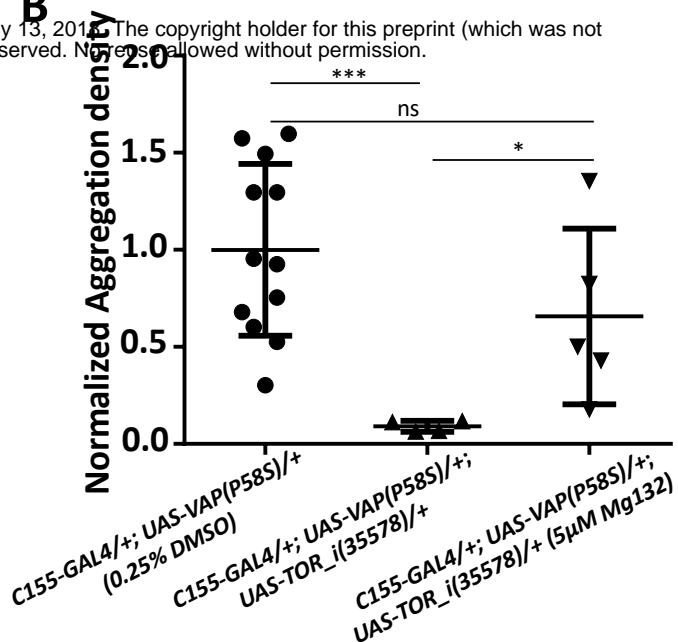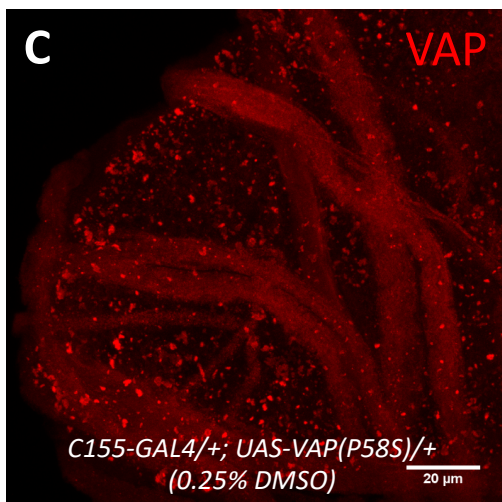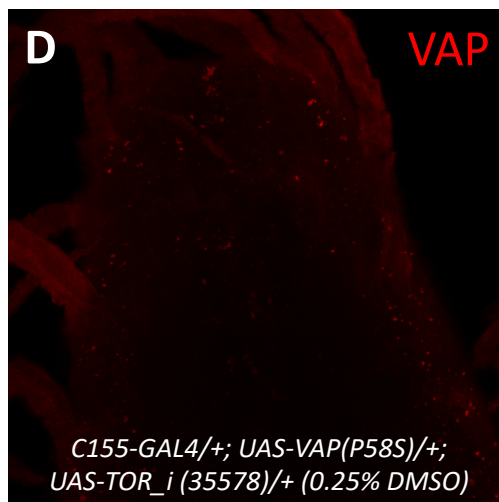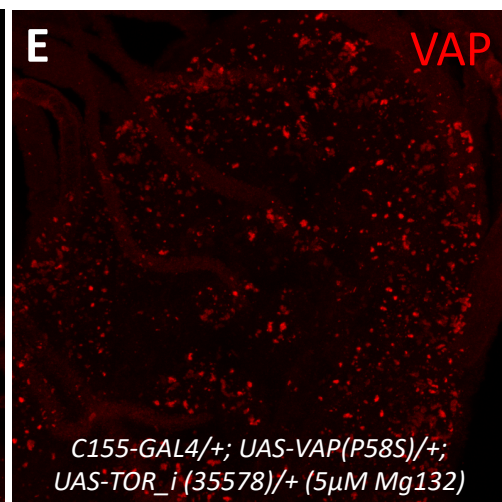

F

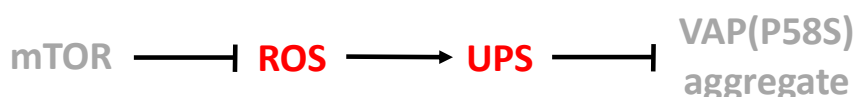

### Figure 7: mTOR inhibition increases ROS leading to proteasomal degradation of VAP(P58S) protein/aggregates:

**A:** Heat map depicting change in levels of oxidized phospholipids with *TOR* knockdown normalized to *C155-GAL4/+*, quantified using MS in response to ROS generated in third instar larval brains (N=3/4) for the listed genotypes. Statistical tests are described in supplementary table 2

**B:** Plot showing significant decrease in aggregation density in the ventral nerve cord in *C155-GAL4/+; UAS-VAP(P58S)/+; UAS-TOR\_i(35578)/+* as compared to *C155-GAL4/+; UAS-VAP(P58S)/+* control. This decrease is partially rescued by feeding 5μM MG132. ANOVA (P-value: \*\*, 0.0042) Fisher's LSD multiple comparison test (P-values, \* < 0.05, \*\*\* < 0.001)

**C,D,E:** Representative images of third instar larval brains showing the partial recovery of aggregates upon 5μM MG132 feeding in *C155-GAL4/+; UAS-VAP(P58S)/+; UAS-TOR\_i(35578)/+* larvae. All images were taken at the same magnification.

**F:** Model depicting the role of mTOR-regulated ROS in activating proteasomal degradation of VAP(P58S) protein/aggregates.

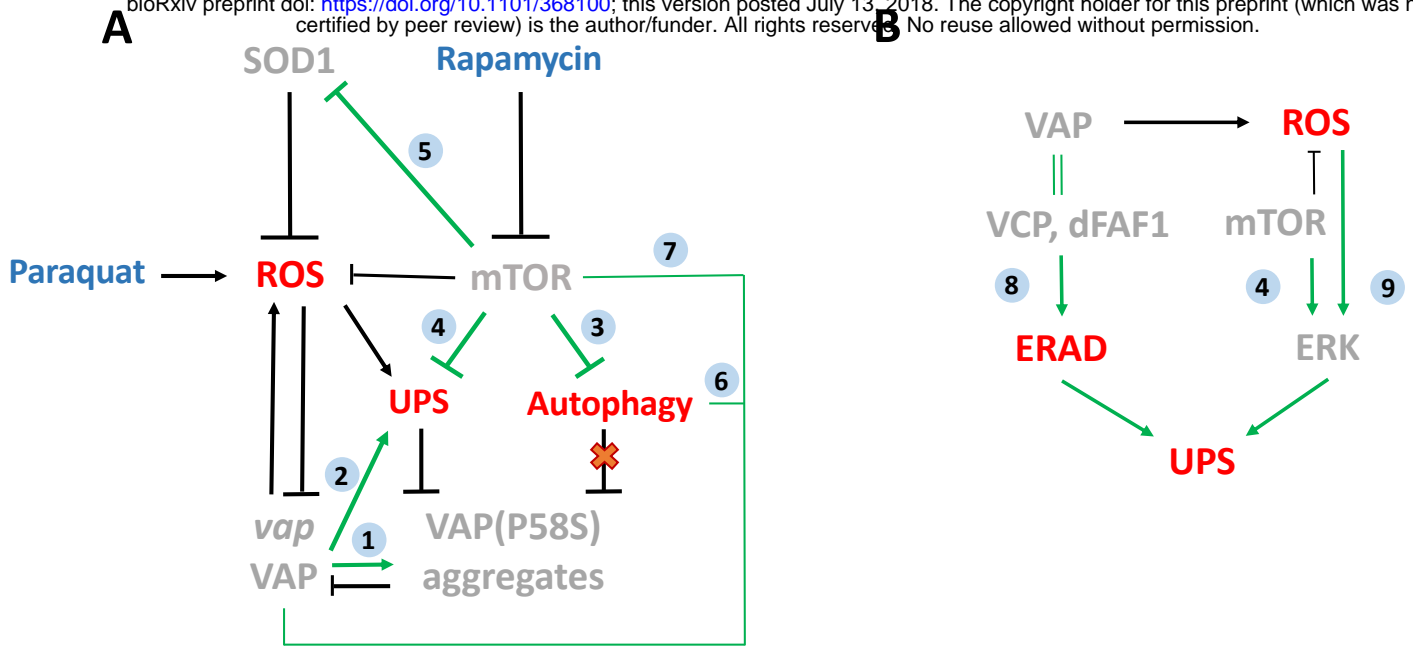

**Figure 8: An integrated model for ROS mediated clearance of VAP(P58S) aggregates via UPS.**

**A:** Model depicting novel relationships of SOD1(ALS1) and mTOR- induced ROS with *vap* and VAP(P58S) aggregates. Clearance of VAP(P58S) protein/aggregates appears to be primarily via the Ubiquitin-Proteasomal system (UPS), triggered by cellular pathways such as mTOR pathway, SOD1 and VAP activity, which in turn regulate ROS. Autophagy does not appear to be a major contributor for aggregate clearance, under the conditions of our experiment.

**B:** A hypothetical model proposing the possible link between VAP, ROS and UPS. VAP could regulate the UPS via the ERAD pathway due to its interaction with VCP via dFAF1/Caspar. ROS could be the connecting link between mTOR pathway and ERK pathway that together regulate the components of the proteasomal machinery. The link between VAP and ROS that we have demonstrated could modulate proteasomal activity in the cell.

Gray text indicates Genes (*italics*) and proteins (Capitals); Red text indicates cellular mechanisms; Blue text indicates drugs; Arrows: Black: Experimental evidence, this study; Green: Relationship described in literature; Numbers inside blue circles indicate research papers: **1.** Ratnaparkhi *et al.*, 2008; **2.** Kanekura *et al.*, 2005; Kuijpers *et al.*, 2013; **3.** Noda and Ohsumi, 1998; Perluigi *et al.*, 2015; **4.** Zhao *et al.*, 2015; Rousseau *et al.*, 2016; **5.** Sun *et al.*, 2012; Tsang *et al.*, 2018; **6.** Gomez-Suaga *et al.*, 2017; Zhao *et al.*, 2018; **7.** Deivaisigamini *et al.*, 2014; **8.** Baron *et al.*, 2014; Papiani *et al.*, 2012; **9.** Cavanaugh *et al.*, 2006; Su *et al.*, 2014.



A

bioRxiv preprint doi: <https://doi.org/10.1101/368100>; this version posted July 13, 2018. The copyright holder for this preprint (which was not certified by peer review) is the author/funder. All rights reserved. No reuse allowed without permission.

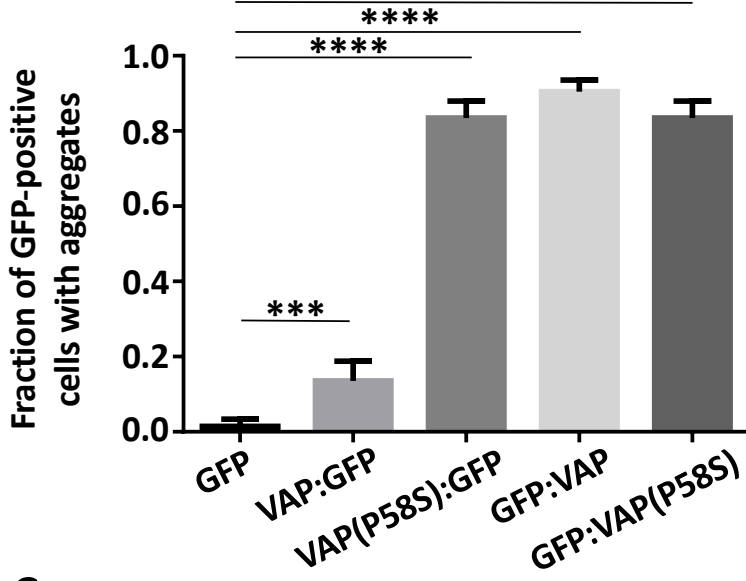

B

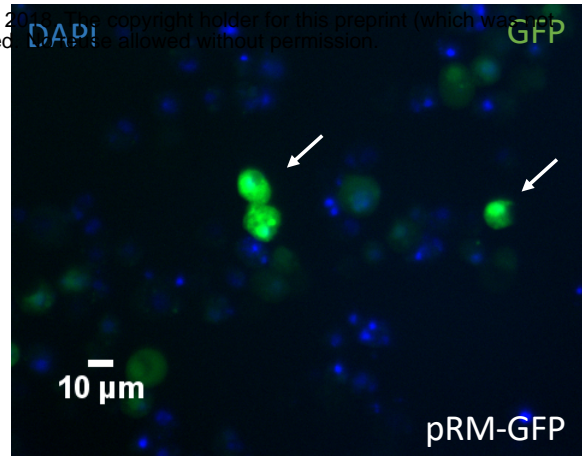

### SUPPLEMENTARY FIGURE 1:

**A:** Fraction of GFP-positive cells showing aggregates plotted for transiently transfected with C-terminally or N-terminally tagged GFP constructs of VAP or VAP(P58S) and only CFP construct at 24 hours post 500 $\mu$ M CuSO<sub>4</sub> induction. Unlike C-terminally tagged VAP, N-terminally tagged VAP forms aggregates as compared to GFP alone. Both C and N-terminally tagged VAP(P58S) proteins form aggregates. ANOVA (P-value: \*\*\*\*<0.0001) Fisher's LSD multiple comparison test (P-values, \*\*\*<0.001, \*\*\*\*<0.0001).

**B:** Homogenous cytoplasmic expression of GFP in S2R+ cells.

**C:** The end result of the screen: a list of 85 genes identified based on total cell intensity as a parameter; these genes are predicted to modify aggregation of VAP(P58S):GFP. Graph displays the percent fold enrichment of targets within each gene category. Genes are listed in *Suppl. Table 1D*.

C

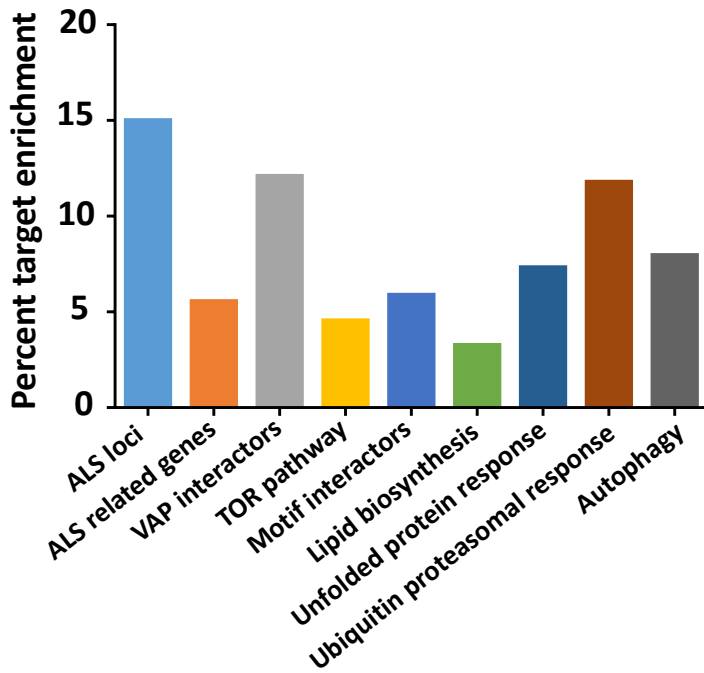

*C155-GAL4/+; UAS-VAP/+*

bioRxiv preprint doi: <https://doi.org/10.1101/368100>; this version posted July 13, 2018. The copyright holder for this preprint (which was not certified by peer review) is the author/funder. All rights reserved. No reuse allowed without permission.

*C155-GAL4/+; UAS-VAP(P58S)/+*

*C155-GAL4/+; UAS-VAP(P58S)/+;*

*UAS-VAP\_i(27312)/+*

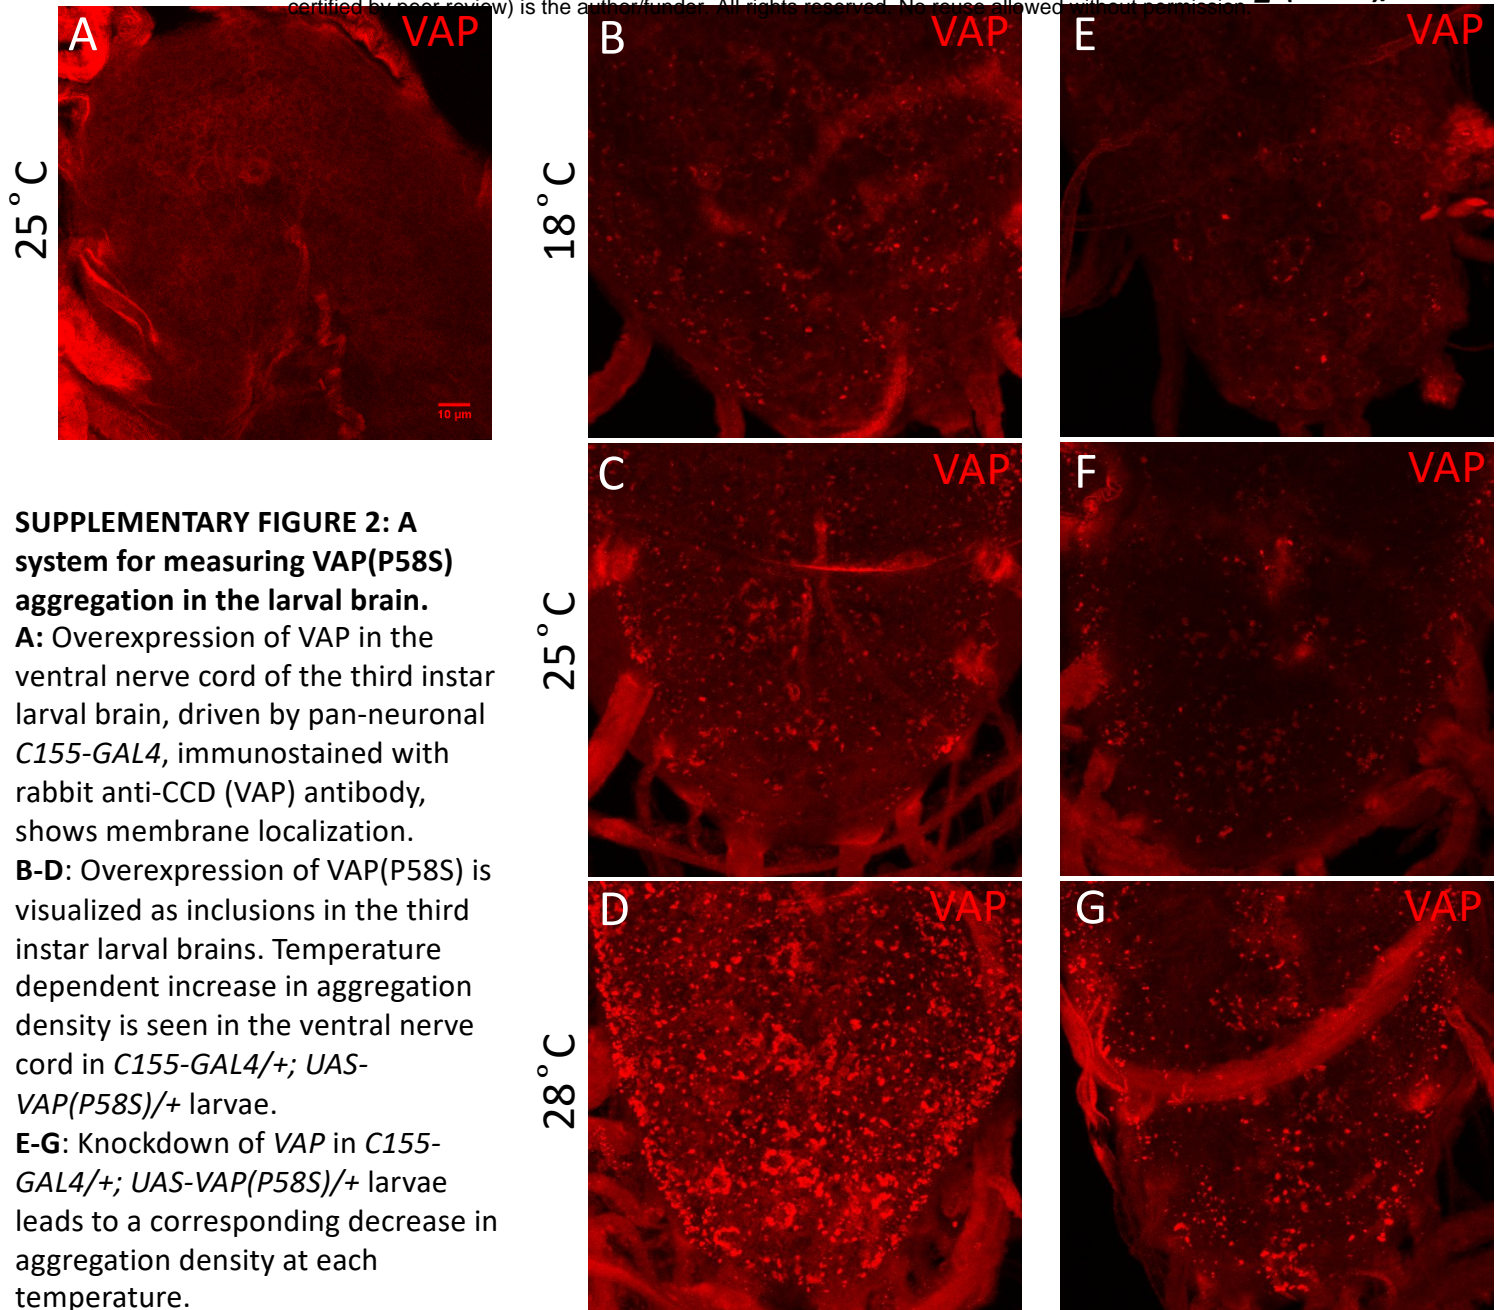

**SUPPLEMENTARY FIGURE 2: A system for measuring VAP(P58S) aggregation in the larval brain.**

**A:** Overexpression of VAP in the ventral nerve cord of the third instar larval brain, driven by pan-neuronal *C155-GAL4*, immunostained with rabbit anti-CCD (VAP) antibody, shows membrane localization.

**B-D:** Overexpression of VAP(P58S) is visualized as inclusions in the third instar larval brains. Temperature dependent increase in aggregation density is seen in the ventral nerve cord in *C155-GAL4/+; UAS-VAP(P58S)/+* larvae.

**E-G:** Knockdown of VAP in *C155-GAL4/+; UAS-VAP(P58S)/+* larvae leads to a corresponding decrease in aggregation density at each temperature.

**H:** Plot showing significant increase in VAP(P58S) aggregation density with increase in temperature, and a significant decrease in aggregation density in the ventral nerve cord in *C155-GAL4/+; UAS-VAP(P58S); UAS-VAP\_i(27312)/+* as compared to *C155-GAL4/+; UAS-VAP(P58S)/+* control in a temperature dependent manner.

All images were taken at the same magnification. ANOVA (P-value: \*\*\*\*<0.0001) Fisher's LSD multiple comparison test (P values, \*<0.05, \*\*<0.01, \*\*\*<0.001).

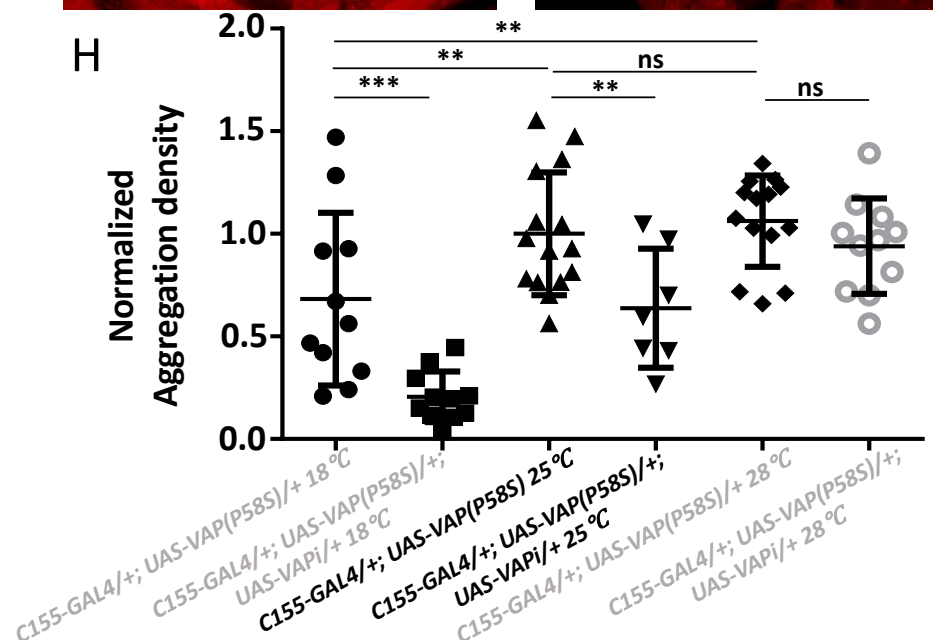

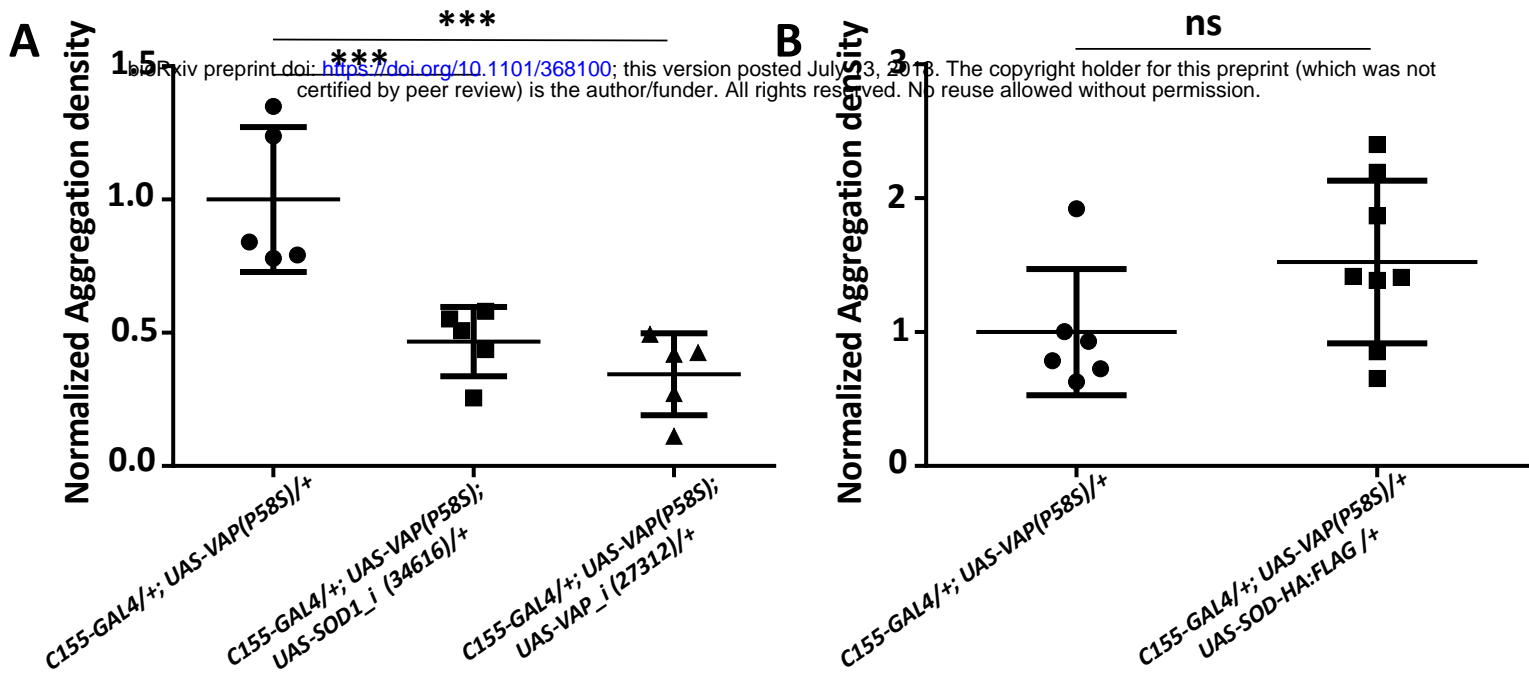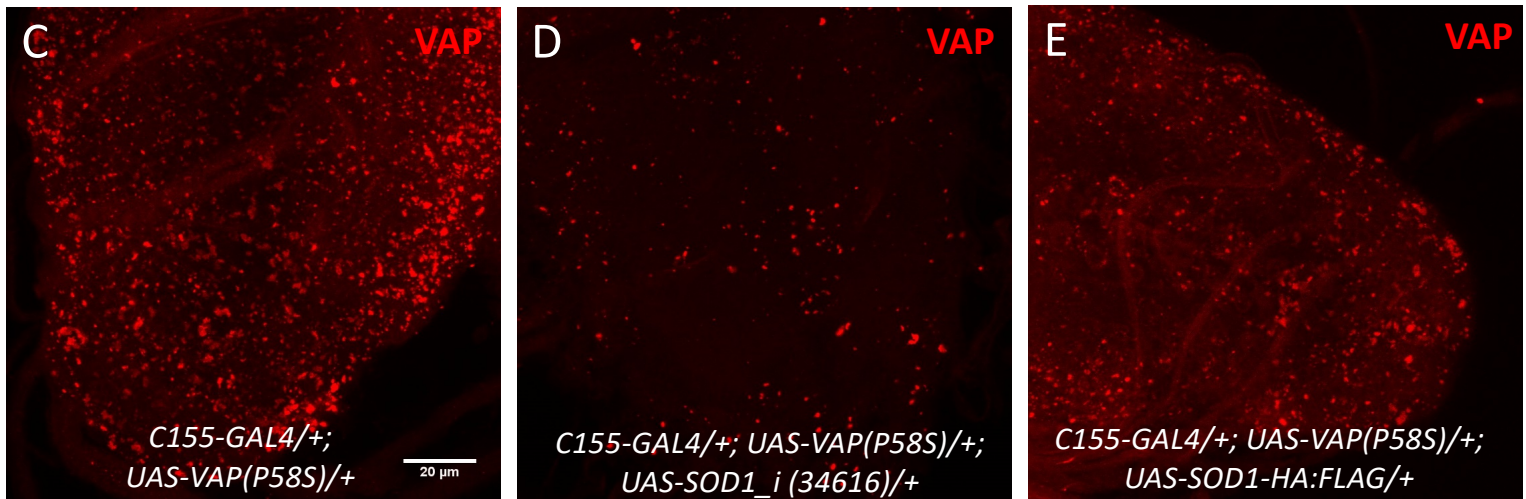

**SUPPLEMENTARY FIGURE 3: ROS scavenging genes modulate VAP(P58S) aggregation density in the third instar larval brain**

**A:** *SOD1* knockdown decreases aggregation density. ANOVA (P-value **\*\*\***, 0.0004) Fisher's LSD multiple comparison test (P-value, **\*\*\***<0.001)

**B:** *SOD1:HA:Flag* overexpression does not affect aggregation density. Student's t test (P-value: 0.1066)

**C, D, E:** Representative images of the ventral nerve cord showing aggregation of VAP(P58S) (**C**), with *SOD1* knockdown (**D**), and with *SOD1-HA:Flag* overexpression (**E**). All images were taken at the same magnification.

**F:** *SOD2* or *Catalase* knockdown reduces aggregation density. Overexpression of *SOD2* does not change aggregation density, however overexpression of *Catalase* increases aggregation density. The '*i*' appended to the gene name indicates an RNAi line. ANOVA (P-value: **\*\*\*\***<0.0001) Fisher's LSD multiple comparison test (P-value, **\*\***<0.01, **\*\*\***<0.001).

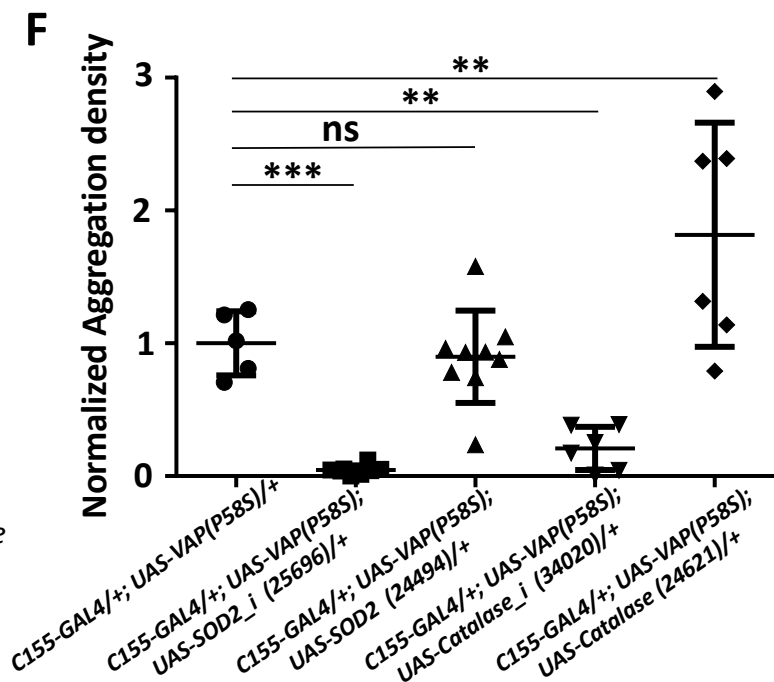

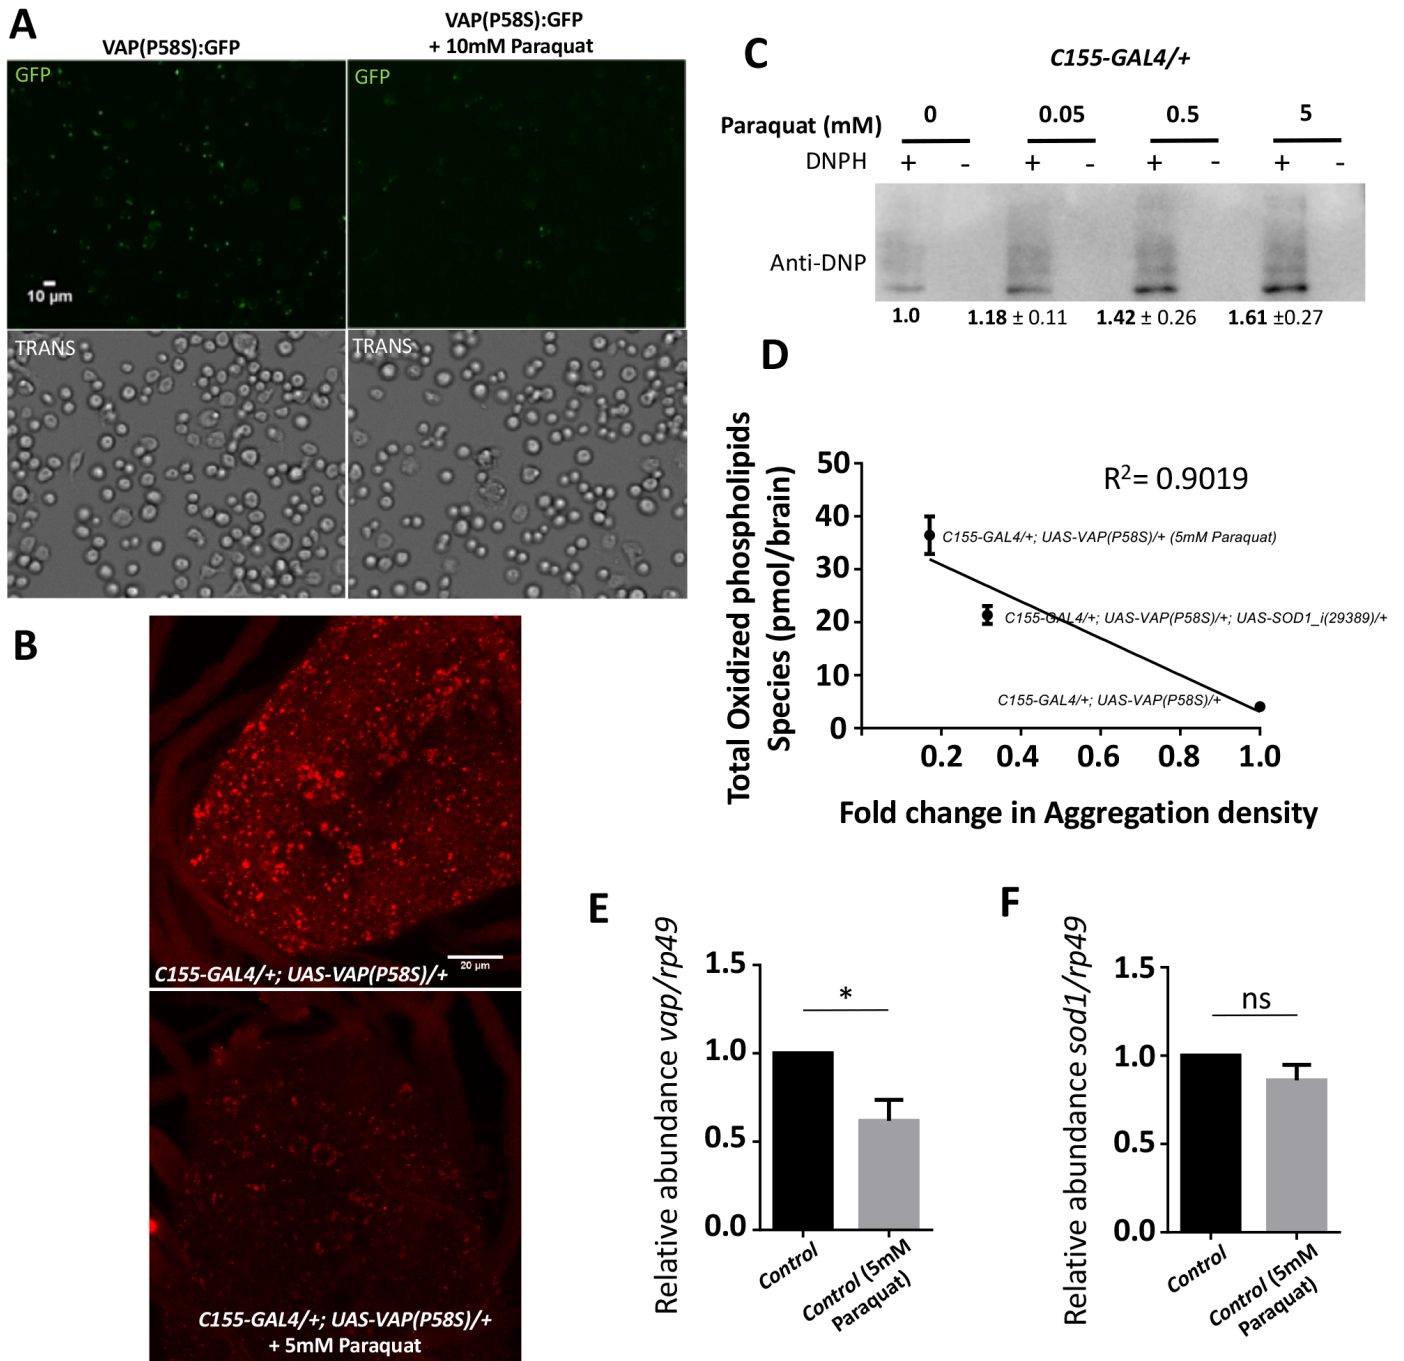

**SUPPLEMENTARY FIGURE 4: ROS levels are modulated by SOD1 and VAP and vice-versa.**

**A:** 10 mM Paraquat treatment for 4 hour, prior to inducing VAP(P58S):GFP in stable S2R+ cell line, reduces the fraction of cells showing aggregation observed 24 hours post-induction.

**B:** Feeding 5 mM paraquat decreases aggregation density in the ventral nerve cord of third instar larval brains in *C155-GAL4/+; UAS-VAP(P58S)/+* flies. All images are taken at the same magnification.

**C:** Higher levels of protein oxidation in larval brains (N=10) is seen using Oxyblot, in response to Paraquat feeding. This experiment serves as a calibration/standard for Fig. 4D. Values below the gel indicate fold intensity of the strongest band, when compared to the control (0 mM paraquat).

**D:** Inverse correlation between total oxidized phospholipids and fold change in aggregation density.

**E:** Relative mRNA levels *VAP*, in the larval brain are lowered on treatment with 5mM paraquat suggesting that high levels of ROS may negatively regulate *VAP* transcripts. Student's t test was performed. P-value  $< 0.05$

**F:** Relative mRNA levels of *sod1*, in the larval brain, do not change in larvae fed with 5mM paraquat.
